# Supplementary material
Source: PubMed Central journal article supplement (PMC6978155)
Supplement: bloodBLD2019002699-suppl1.pdf [file bloodBLD2019002699-suppl1.pdf]

# **Supplemental Material**

**Ramis-Zaldivar *et al***

|                                     |                |
|-------------------------------------|----------------|
| <b>Supplemental Methods.....</b>    | <b>Page 3</b>  |
| <b>Supplemental Results.....</b>    | <b>Page 8</b>  |
| <b>Supplemental Figures.....</b>    | <b>Page 9</b>  |
| <b>Supplemental Tables.....</b>     | <b>Page 22</b> |
| <b>Supplemental References.....</b> | <b>Page 36</b> |

## **Supplemental Methods**

### **Library preparation SureSelectXT and Targeted sequencing approach**

A total of 55 DNA samples, including 47 extracted from formalin fixed paraffin embedded (FFPE) tissue and 8 frozen materials, were processed using SureSelectXT (Agilent Technologies, Santa Clara, CA) a custom panel interrogating 96 genes, that was designed according to previous literature in DLBCL and other B-cell lymphomas in both adult and children population (**Supplemental Table 2**). Data from four cases have been previously published.<sup>1</sup>

A total of 100ng of genomic DNA were sheared using the Covaris S220 focused-ultra sonicator (Covaris, Woburn, MA) to a target peak size of 150–200 bp. Library preparation was performed using SureSelectXT Custom Capture Library baits as described in SureSelectXT Target Enrichment System protocol (Agilent Technologies inc.). For amplification of the post capture libraries, 10 to 13 cycles were performed depending on the initial sample quality. The libraries were qualified using the Bioanalyzer HS (Agilent technologies inc.), quantified with the KAPA Library Quantification Kit (Kapa Biosystems, Wilmington, Massachusetts) and sequenced in a MiSeq instrument (Illumina, San Diego, CA) in a paired-end run of 150 bp. The average sequencing coverage of the 55 LBCL cases across regions was 447x (range 28-1439x) and over 84% of the targeted regions were covered by at least 100 reads.

FASTQ files were generated by MiSeq control software and quality control of the raw data was performed using the FastQC tool (<https://www.bioinformatics.babraham.ac.uk/projects/fastqc/>).

Sequencing reads were subsequently aligned to the human reference genome (GRCh37/hg19) using the Burrows-Wheeler Aligner–MEM algorithm.<sup>2</sup> Variant calling was performed using two different variant callers, Somatic Variant Caller (Illumina inc.) and Mutect2 (Genome Analysis Toolkit (GATK), version 4.0.3)<sup>3</sup> and variants were annotated using the VariantStudio software v3.0 and ANNOVAR respectively.<sup>4</sup> For Somatic Variant Caller (Illumina inc.), default settings were used to analyze sequencing results and to call the variants. Low quality or low coverage calls (total depth <20) were excluded. For Mutect2 variants, low quality variants were also excluded using FilterMutectCalls (GATK) with default thresholds. Only variants identified by both

algorithms were considered. We excluded variants affecting non-interrogated regions and known polymorphisms described in the GnomAD, 1000 Genomes and/or ExAC database (release 2015) with more than 0.1% frequency in normal population. In order to exclude artifacts, each variant was also inspected with the Integrative Genomics Viewer (IGV, Broad Institute, version 2.3) software. We ended up with 781 mutations including synonymous variants (**Supplemental Figure 1**).

Since DNA was extracted from FFPE or frozen tissue, FFPE DNA quality was evaluated using a qPCR in which fragments of 100bp and 200bp were amplified using primers previously described<sup>5</sup> and Fast SYBR Green Master Mix (Life Technologies inc.).  $\Delta$ Ct value was calculated for each sample comparing CT value for tumor DNA with the Ct value of gDNA control. The higher was the value, the more degraded was the FFPE DNA.

#### **Driver prediction by mutation effect**

Since no germline DNA was available and in order to select somatic variants, potential driver mutations were predicted according to previously published criteria<sup>6</sup> in which the 90% of the mutations classified as functional were demonstrated to be somatic. Inclusion criteria were: 1) variants described previously as somatic or functional on previous reports or COSMIC, 2) all truncating variants (nonsense, frameshift, splice donor or acceptor mutations; and 3) the remaining missense variants that were predicted to be functionally deleterious using Mutation Assessor<sup>7</sup> or SIFT predictor if a score was not provided by Mutation Assessor.<sup>8</sup> Other functional predictors as Polyphen-2 (Polymorphism Phenotyping-2)<sup>9</sup>, CADD (Combined Annotation Dependent Depletion)<sup>10</sup> and CHASM-3.1<sup>11</sup> were also applied.

#### **Mutational signatures**

Mutational signatures contribution was interrogated for both all variants found in 47 primary LBCL and per frequently mutated genes using a fitting approach (MutationalPatterns R package).<sup>12</sup> Only mutational signatures described in adult DLBCL<sup>13,14</sup> corresponding to SBS1,

SBS2, SBS3, SBS4, SBS5, SBS8, SBS9, SBS12, SBS17a, SBS17b, SBS18, SBS19, SBS28 and SBS.C1<sup>15</sup> were considered. Only single nucleotide variants not reported as polymorphisms, including synonymous and MYC intron 1, were considered for this analysis.

Signature bleeding between genes was corrected by iteratively removing the least contributing signature (if removal reduced the cosine similarity less than 0.01) with the exception of age-related signatures (SBS1 and SBS5) which were always included due to its known presence in all normal and tumor samples.

### **Aberrant somatic hypermutation (aSHM) hallmarks**

Hallmarks of aSHM were studied in frequently mutated genes (>10 single nucleotide variants including both driver and non-driver predicted mutations, synonymous and MYC-intronic) and included location within AID-target region (defined as 2kb region after 150bp from a transcript start site), a higher transition over transversion ratio and location within AID-motifs (corresponding to sequences WA/TW/WRCY/RGYW/WGCW).<sup>16</sup>

Significance value was calculated comparing the observed proportion of variants with the expected by randomness using Test of Equal or Given Proportions. Therefore, proportion of variants in AID-target region was compared with the expected proportion of interrogated bases that occur in AID-target region, transition over transversion ratio compared with the expected 1/2 ratio and proportion of variants in AID-motifs compared with the expected proportion of interrogated bases within AID-target region that occur in AID-motif.

### **Verification using Ampliseq: Library preparation, amplification and quality control of unenriched libraries**

A total of 37 samples including two relapsed samples were processed (17 DLBCL, 17 LBCL-*IRF4* and 3 HGBCL, NOS) using AmpliSeq (Illumina inc) with a custom panel interrogating recurrent regions of mutation in our series affecting 29 genes (**Supplemental Table 3**). In brief, each DNA probe was mixed with AmpliSeq HiFi Mix and one of the two primer pools, containing

201 or 198 amplicons, respectively. PCR was then transferred to a thermocycler (Applied Biosystems, Foster City, CA). PCR cycling conditions were as follows: Initial denaturation: 99°C for 2 min, cycling: 20 cycles of 99°C, 15 sec and 60°C, 4 min. After the end of the PCR reaction, primer end sequences were partially digested using FuPa reagent, followed by the ligation of Illumina dual sequencing indexes. The final library was purified using AMPure XP magnetic beads (Beckman Coulter, Krefeld, Germany) and quantified using qPCR and Qubit 2.0 Fluorometer (Thermo Fisher Scientific, Waltham, MA). Libraries were diluted to the same concentration (4nM) and an equimolar pool was prepared for each run (n=12 and n= 30, respectively). Each 4nM pool was diluted and load onto MiSeq sequencer, according to Illumina's protocol. The analysis pipeline applied for the identification of *BCL6* mutations in intron 1 was the same described in supplemental Figure 1.

It has been already described in the literature, that long indels or SNV in genes affected by aSHM are not appropriately amplified by PCR-based libraries as Ampliseq system due to an increase mismatch of the primers used for the amplification or to alterations of the amplicon size.<sup>17</sup> These technical aspects of the PCR based amplification result in a lower-than-expected coverage of the amplicon and increased incorrect assessment of variant allele frequencies. This primer mismatch is not only applicable to Ampliseq but also to conventional PCR amplification used Sanger Sequencing analysis. We have then excluded all non verified variants in genes known to be affected by aSHM (*IRF4*, *SOCS1*, *PIM1*, *SGK1* and *BCL2*) or variants affected by long indels in the calculation of our verification rate.

### **Copy number analysis**

DNAs were hybridized on Oncoscan FFPE, SNP6 or Cytoscan array (ThermoFisher Scientific inc.) depending of the tissue. Gains and losses and copy number neutral-loss of heterozygosity (CNN-LOH) regions were evaluated and visually inspected using Nexus Biodiscovery version 9.0 software (Biodiscovery, Hawthorne, CA). Human reference genome was GRCh37/hg19. The copy number alterations (CNAs) with minimum size of 100 kb and CNN-LOH larger than 5

Mb were considered informative. Published Cytoscan CN data from 116 adult DLBCL were used for age related analysis.<sup>6</sup>

### **Nanostring PanCancer Immune Profiling Panel**

RCC files from the NanoString Digital Analyzer were imported into nSolver4.0 software (NanoString, Seattle, WA, USA) and checked for data quality using default QC settings. In the 21 samples (11 LBCL-*IRF4* and 10 DLBCL, NOS) that passed QC, differential expression (DE) and gene set analyses were performed using the nCounter Advanced Analysis (version 2.0.115)(NanoString Technologies inc.). Data normalization was done using the geNorm algorithm, automatically performed by the software. Genes with <20 counts in 100% of the cases were removed for differential expression analysis. *P*-values associated with the fold change were derived using the Benjamin-Yekutieli FDR method. Those genes with a  $\log_2FC > \pm 1$  and  $FDR < .05$  were considered to be differentially expressed.

## **Supplemental Results**

### **DNA and RNA quality analysis according to sample age**

Time frame sample collection was from 1993 to 2019. In our series, we observed that the FFPE antiquity affected DNA quality according to qPCR values. The FFPE antiquity and the DNA quality according to qPCR values did not affect the number of variants or the C>T changes rate (**Supplemental Figure 2**). The antiquity affected the coverage, nevertheless 83% of the FFPE samples had  $\geq 90\%$  of the regions covered at  $\geq 50x$ . Regarding RNA when we correlated binding density quality score from nSolver software (NanoString inc.) with sample antiquity, more ancient samples tend to have less binding density.

### **Mutational signatures analysis**

The relative contribution of mutational signatures previously described in DLBCL<sup>13,14</sup> was investigated for the global cohort of 47 primary LBCL (415 variants including driver, synonymous and *MYC* intron1). Three mutational signatures were identified, including the canonical activation-induced cytidine deaminase (cAID) (SBS.C1 in 43% of the variants) and two age related signatures (SBS1 and SBS5 in 10 and 47% respectively) with a cosine similarity of 0.92. When the relative contribution of these three mutational signatures was investigated for genes with at least 10 mutations, AID signature was detected in genes previously known<sup>18</sup> to be targets of aSHM such as *SOCS1*, *IRF4*, *PIM1*, *SGK1* and *MYC* (**Supplemental Figure 5, Supplemental Table 9**).

### ***RHOA* mutational analysis by Sanger sequencing**

Due to the presence of *GNA13* mutations in 14% and 13% of DLBCL and HGBCL, NOS of our series respectively, we hypothesized that another gene of the same pathway as *RHOA* could be also mutated in our series. Mutations of *RHOA* have been rarely observed in DLBCL (1-3%).<sup>13,19,20</sup> but is highly recurrent in BL.<sup>21</sup> We then performed Sanger sequencing of *RHOA* exon 2 and 3 in 16 cases (9 DLBCL, 5 HGBCL, NOS and 2 DLBCL relapsed samples with DNA available). Only one DLBCL case presented a SNV in 5R>W position.



## Supplemental Figures

**Supplemental Figure 1.** Next generation sequencing (NGS) analysis pipeline followed to identify potential driver mutations in the 55 large B-cell lymphomas analyzed. Two different variant callers were used, Somatic Variant Caller (Illumina inc.) and Mutect2 (GATK version 4.0.3). Potential driver mutations were predicted according to previously published criteria.<sup>6</sup>

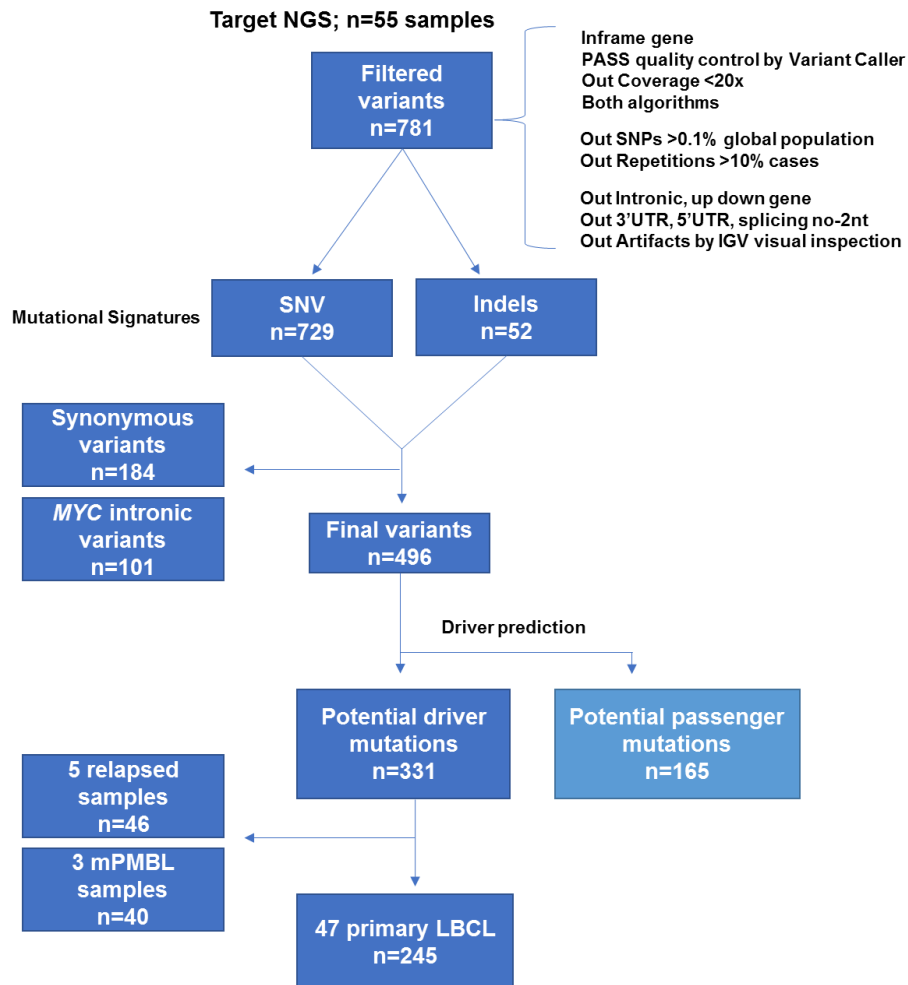

**Supplemental Figure 2.** Quality control of NGS data after filtering according to pipeline. **(A)** Coverage, **(B)** number of variants and **(C)** C>T proportion were assessed in terms of tissue type (FFPE and FT DNA samples) and FFPE DNA antiquity and quality. **(D)** Relative contribution of SNV changes of 47 FFPE and 8 frozen DNA samples. FFPE: formalin-fixed paraffin-embedded; FT: frozen tissue.

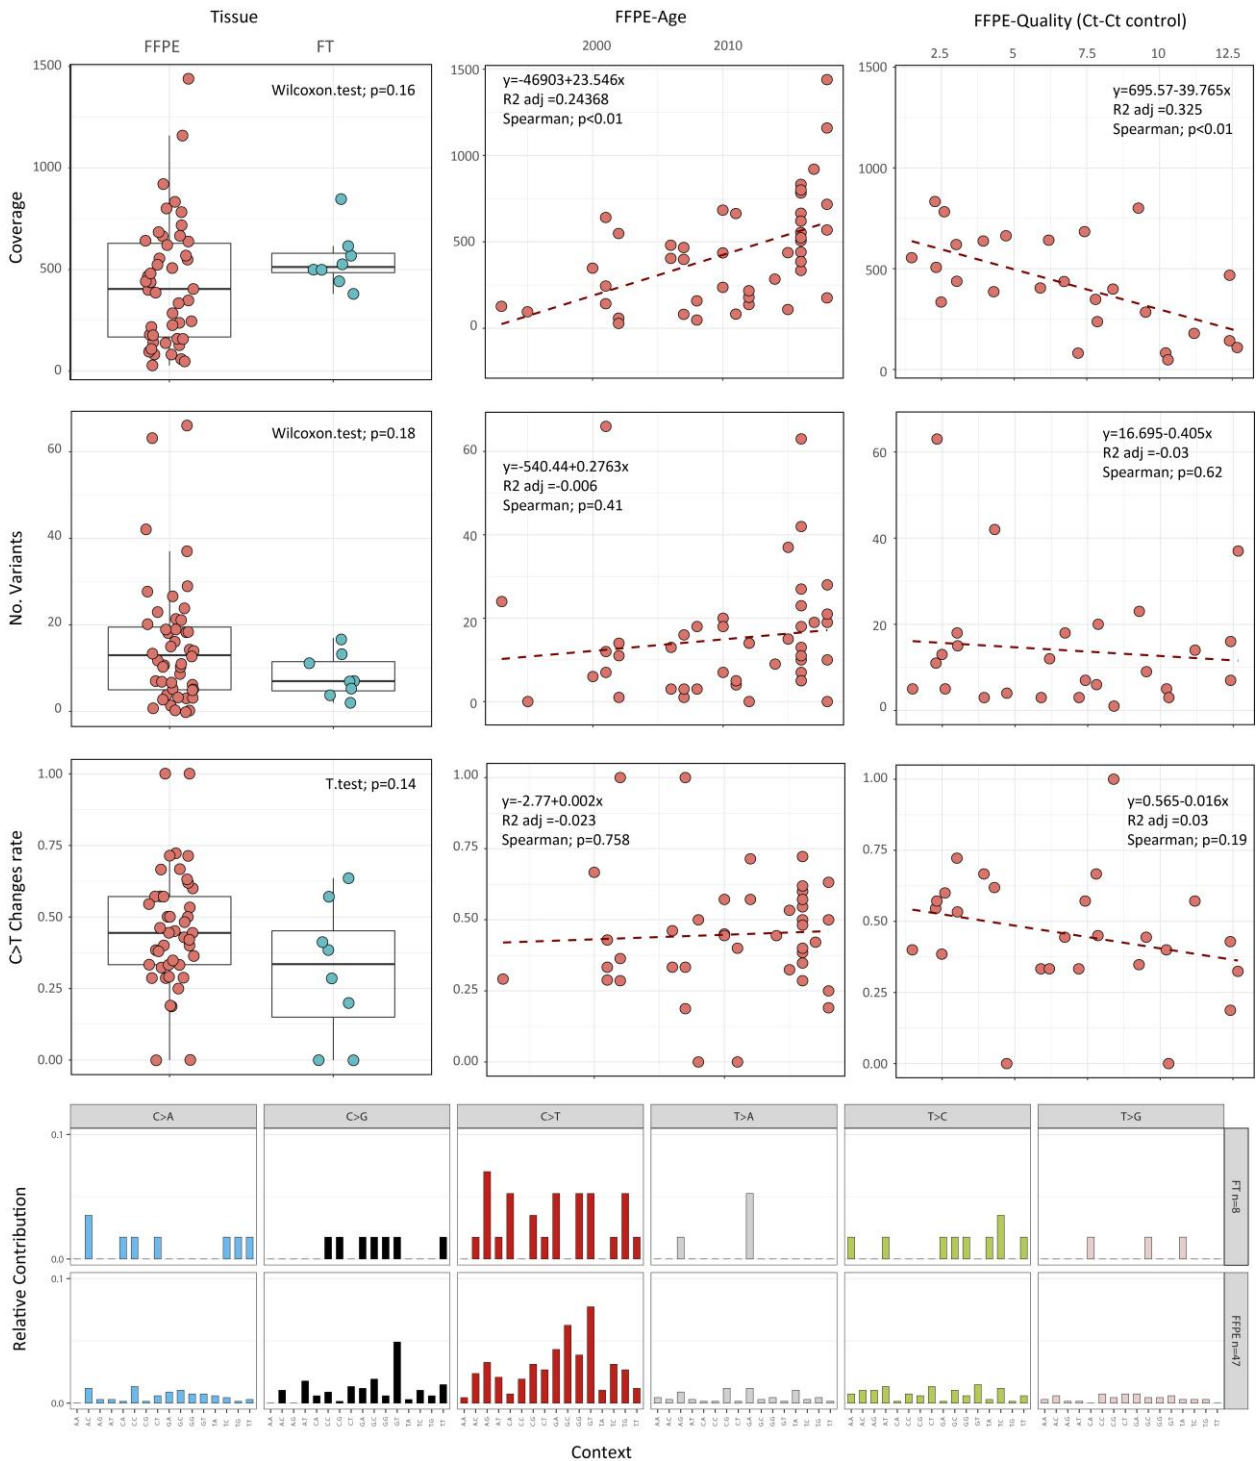

**Supplemental Figure 3.** *IRF4* expression at RNA and protein level between morphological groups. **(A)** Boxplot representing *IRF4* gene expression (number of counts of *IRF4*\_NM\_002460.1 on Lymph2Cx assay) between LBCL-*IRF4* (n=14), DLBCL, NOS (n=25) and HGBCL, NOS (n=9). *IRF4*-R: *IRF4* rearrangement; IGH-R: IGH rearrangement; neg: negative; pos: positive; TCC: tumor cell content. Immunostaining of MUM1/*IRF4* from **(B-C)** D20 and D31 which are *IRF4*-negative IGH-positive LBCL-*IRF4* cases, **(D-E)** cases D17 and D15 which are *IRF4*-positive LBCL-*IRF4*.

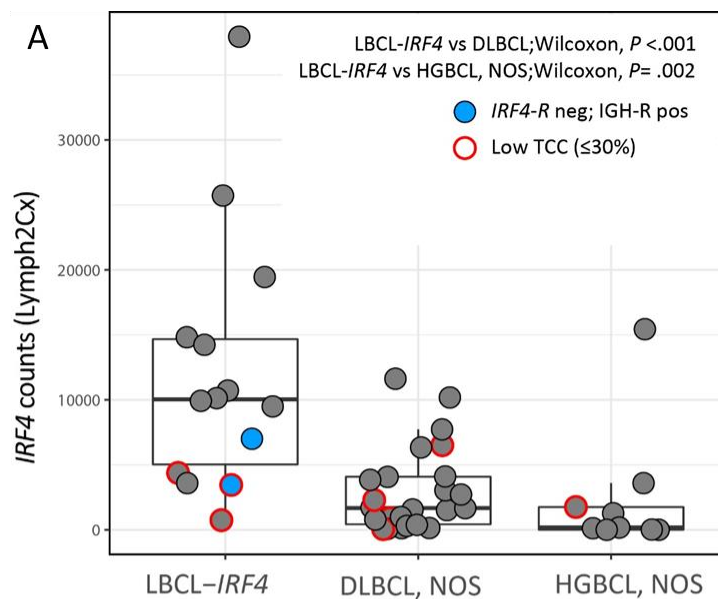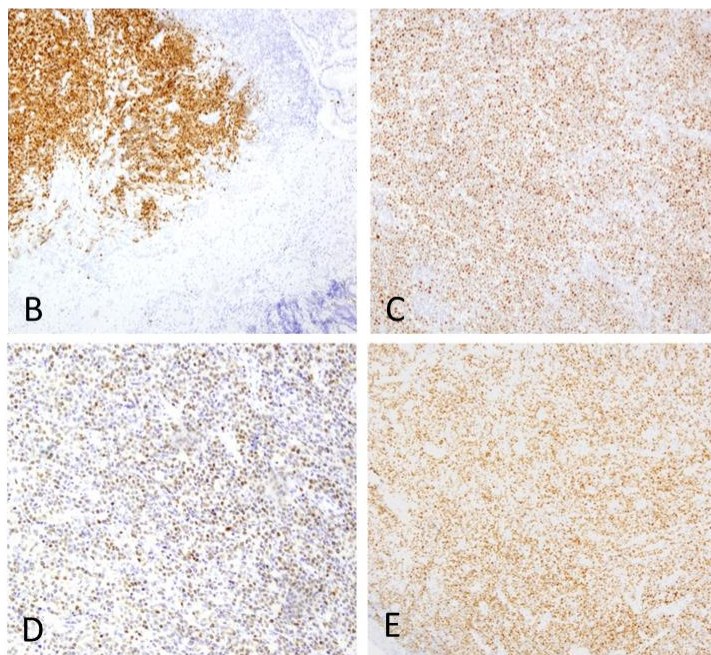

**Supplemental Figure 4.** Morphological, immunophenotypical and genetic features of a high grade B-cell lymphoma, NOS with *MYC* rearrangement. (Case D73) **(A, H&E)** showing cytological features intermediate between DLBCL and BL and **(B)** FISH with *MYC* break-apart depicting a signal constellation of one colocalization (yellow arrow) and one split signal (red and green arrows), and **(C)** ideogram of the copy number, copy number neutral-loss of heterozygosity (CNN-LOH) and mutational features of this case.

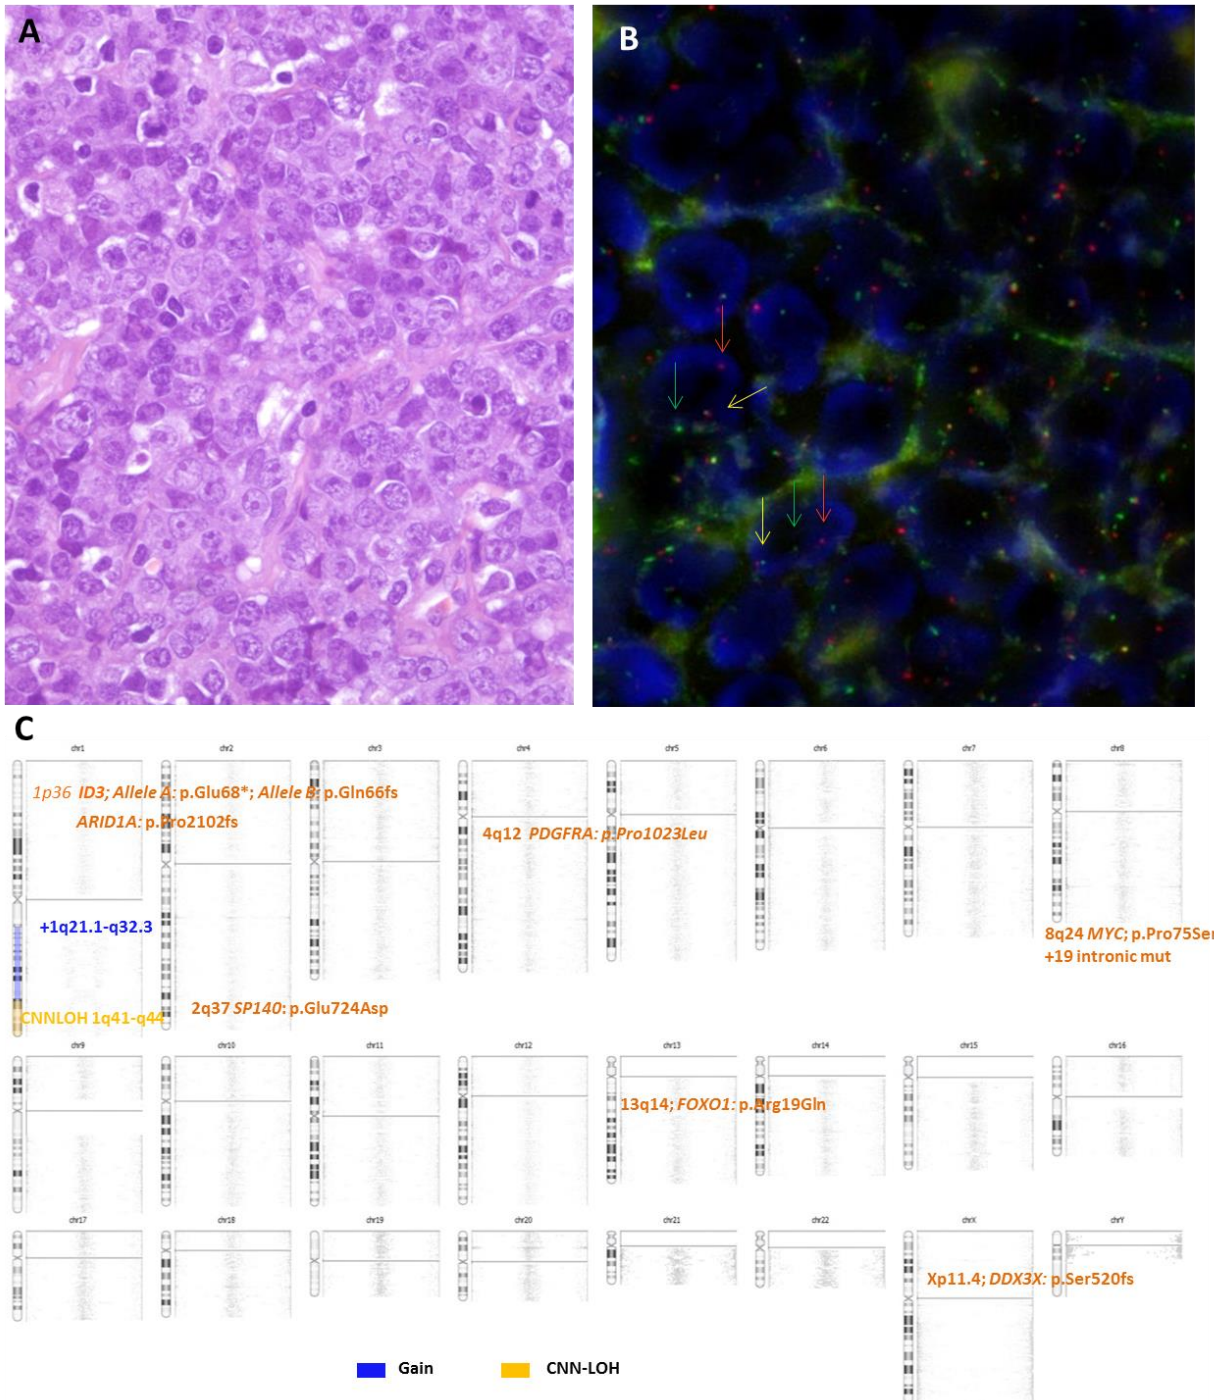

**Supplemental Figure 5.** Molecular features of current LBCL series according to recurrent mutational profiles on Primary mediastinal large B-cell lymphoma (PMBL), Burkitt Lymphoma (BL), pediatric type follicular lymphoma (PTFL) and Burkitt like lymphoma with 11q aberration (BLL-11q).

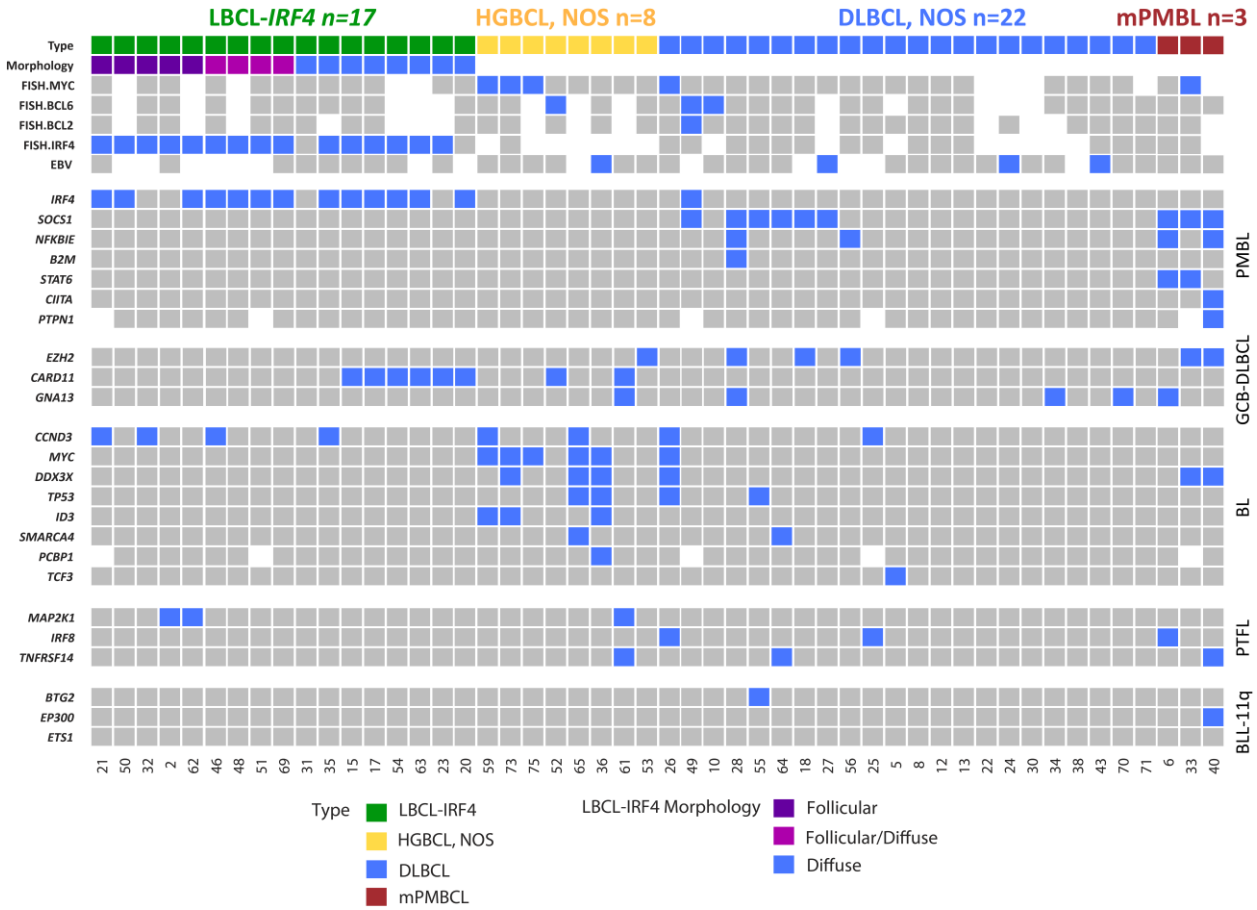

**Supplemental Figure 6.** Relative contribution of previously described signatures in DLBCL, NOS<sup>13,14</sup> for both all the variants found in 47 primary LBCL and per frequently mutated genes (at least 10 mutations). Single nucleotide variants including both driver and non-driver predicted mutations, synonymous and *MYC*-intronic mutations were considered for the analysis.

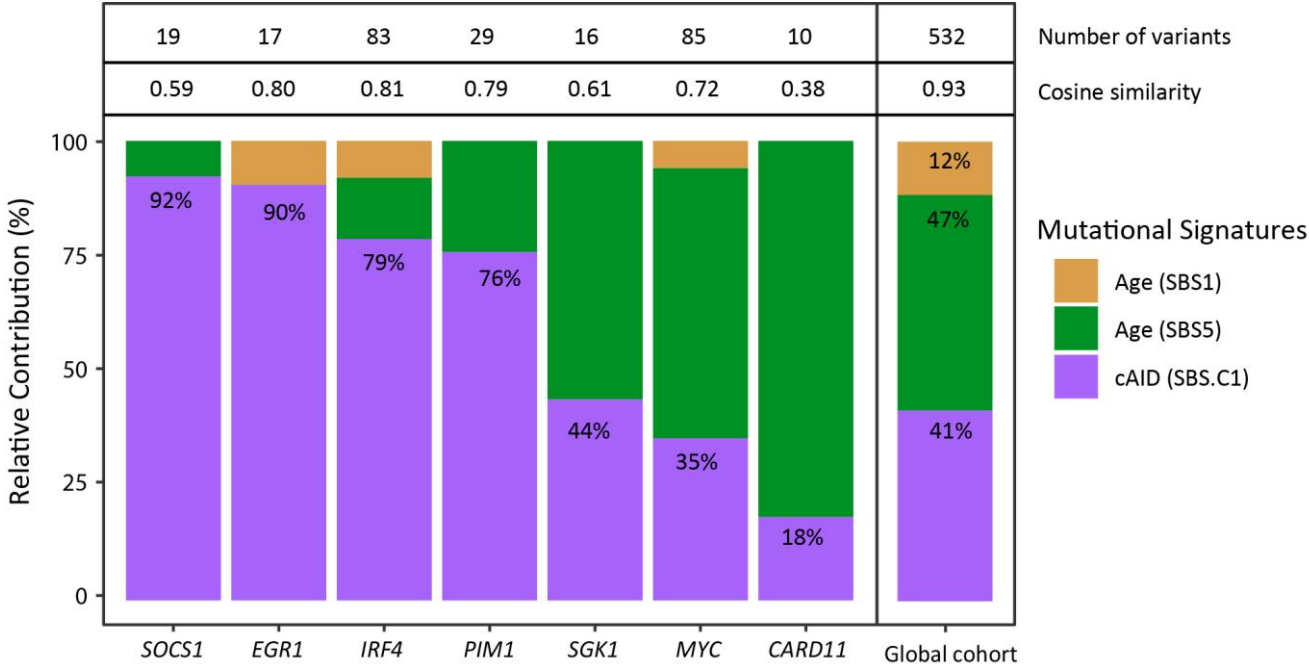

**Supplemental Figure 7.** Mutational profile of 25 pediatric/young-adult DLBCL, NOS according to cell of origin (Lymph2Cx and Lymph3Cx) determination. No significant differences in terms of mutation frequencies were observed between ABC and GCB (Fisher-test; NS).

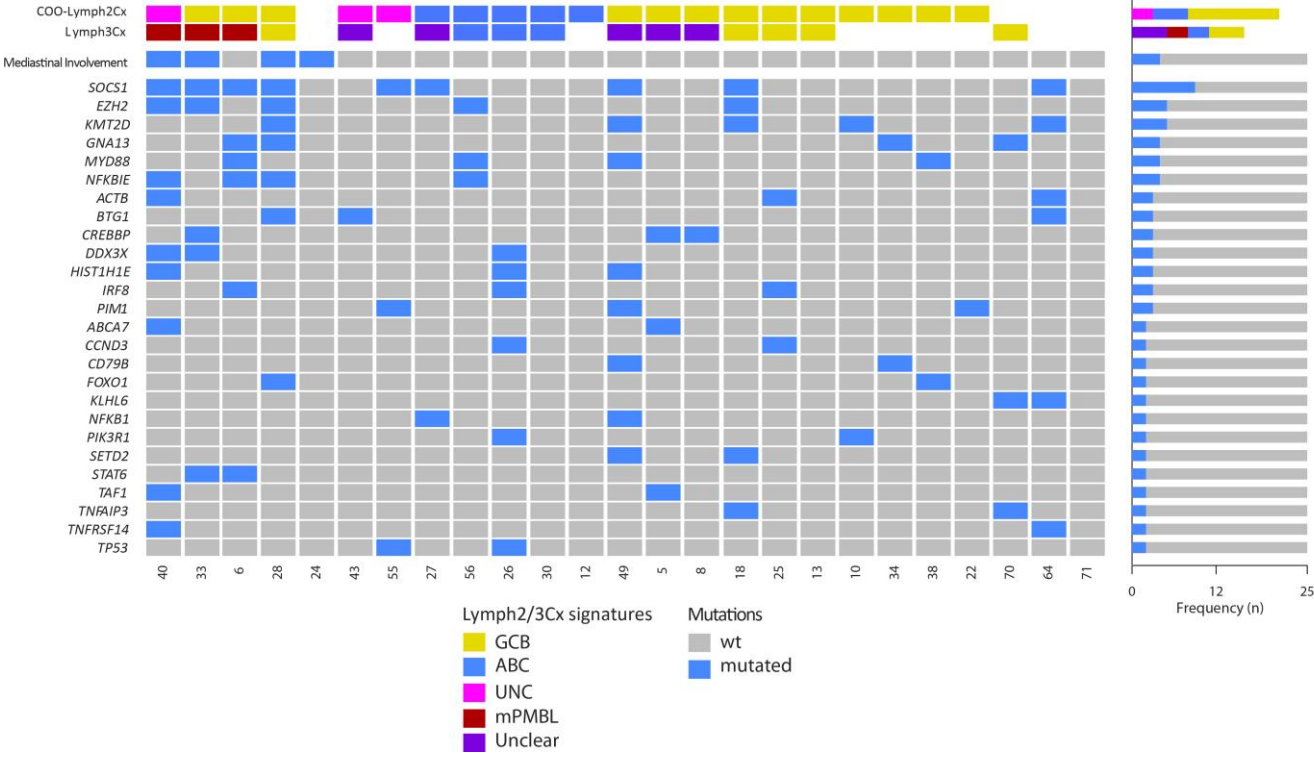

**Supplemental Figure 8. Comparison of pediatric/young-adult versus adult DLBCL, NOS. (A)**

Percentage of mutated cases in pediatric/young-adult (upper panel) and adult DLBCL, NOS (lower panel) of the most frequently mutated genes interrogated in both series (at least 5 cases). Asterisk indicates differentially mutated genes between age groups ( $P < .05$ ). **(B)** Comparative plot of copy number and copy number neutral-loss of heterozygosity (CNN-LOH) between 22 pediatric/young-adult DLBCL, NOS and 116 adult DLBCL, NOS. Significant different regions are indicated in the plot and the color denotes the enriched group (FDR < .1). GCB: germinal center B-cell; ABC: activated B-cell; UC: unclassified/intermediate; ND/NE: not done/not evaluable.

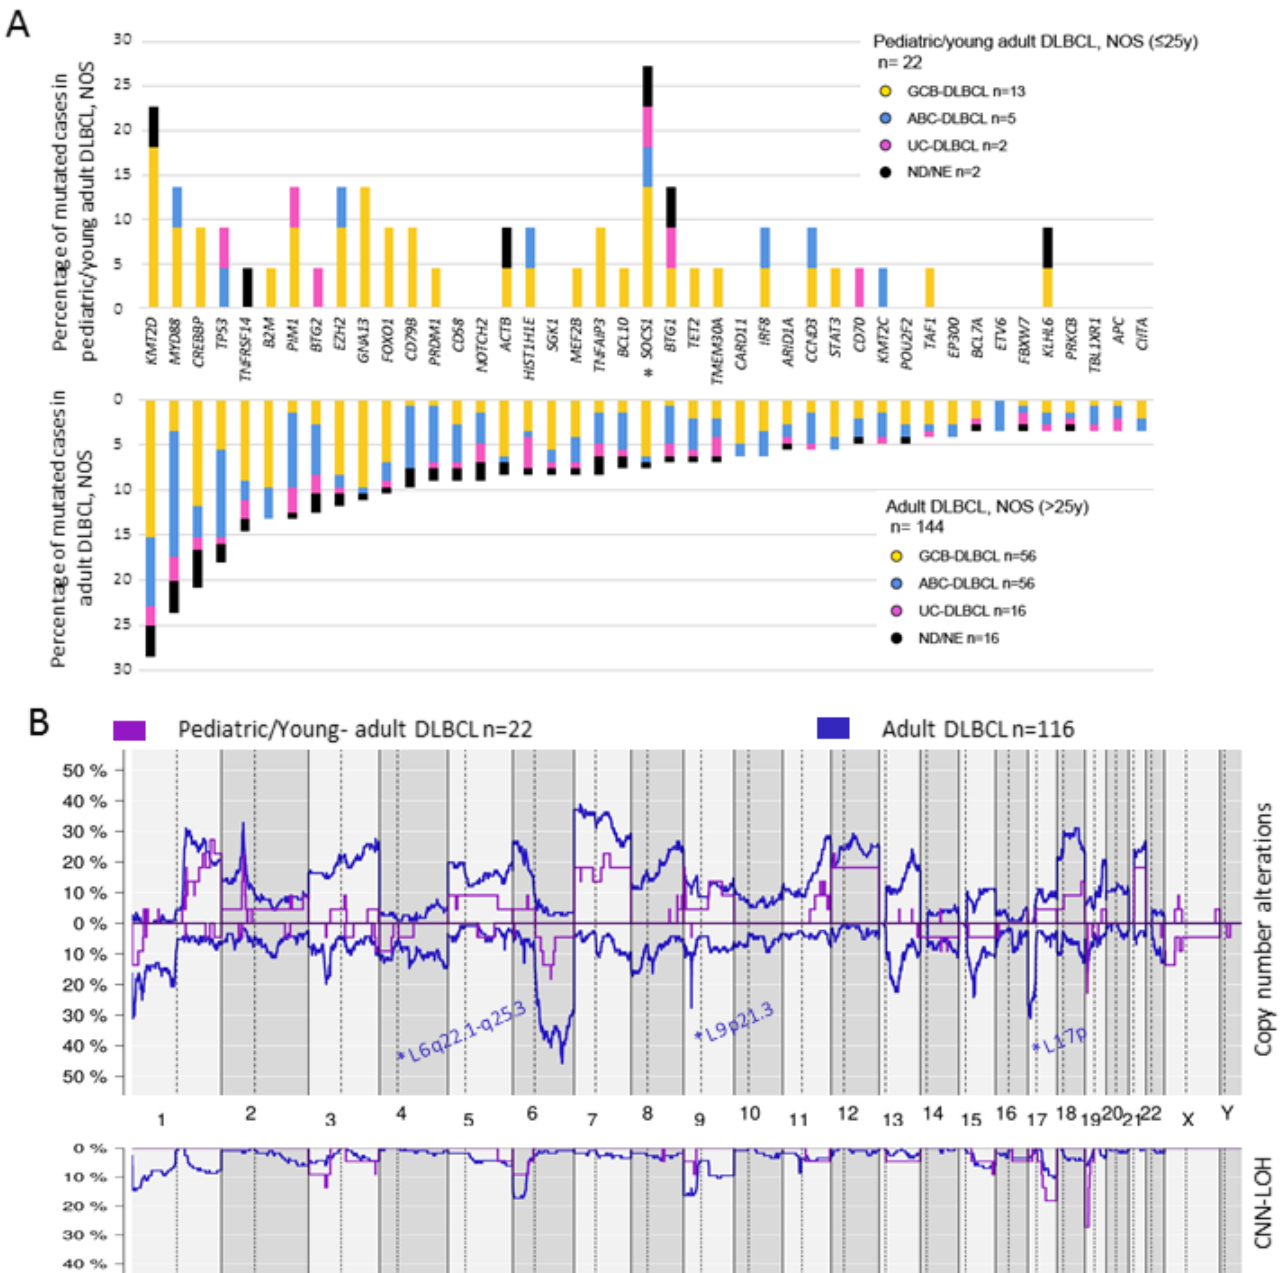



**Supplemental Figure 9.** Recurrent mutated pathways<sup>6</sup> in 47 LBCL primary tumors. Bar-graph shows the total number of mutated cases for each pathway. Each color bar indicates morphological subtypes. Asterisks represents significant mutated pathway in a morphological subtype.

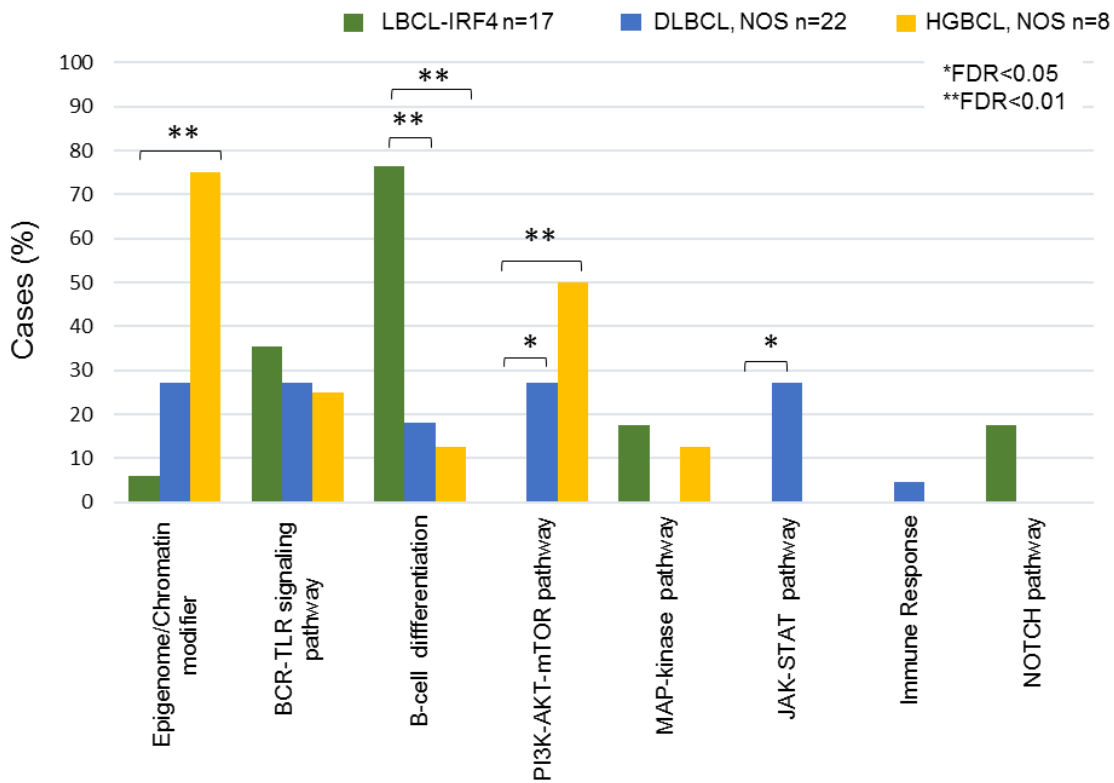

**Supplemental Figure 10. (A)** Detailed representation of mutational landscape by variant allele frequency (VAF) **(B)** and CN profiles of three paired cases (primary tumor-relapsed samples). In A, multiple mutations on a single gene are represented as the mean of mutation VAFs. CN information for each locus is indicated behind each gene. Asterisk denotes that some variants of specific gene are not shared between primary tumor and relapse sample. Acquired mutations are depicted in green, mutations only observed at diagnosis in red and shared mutations in orange. Note that VAF has not been corrected by tumor cell content since it was not available for all samples.

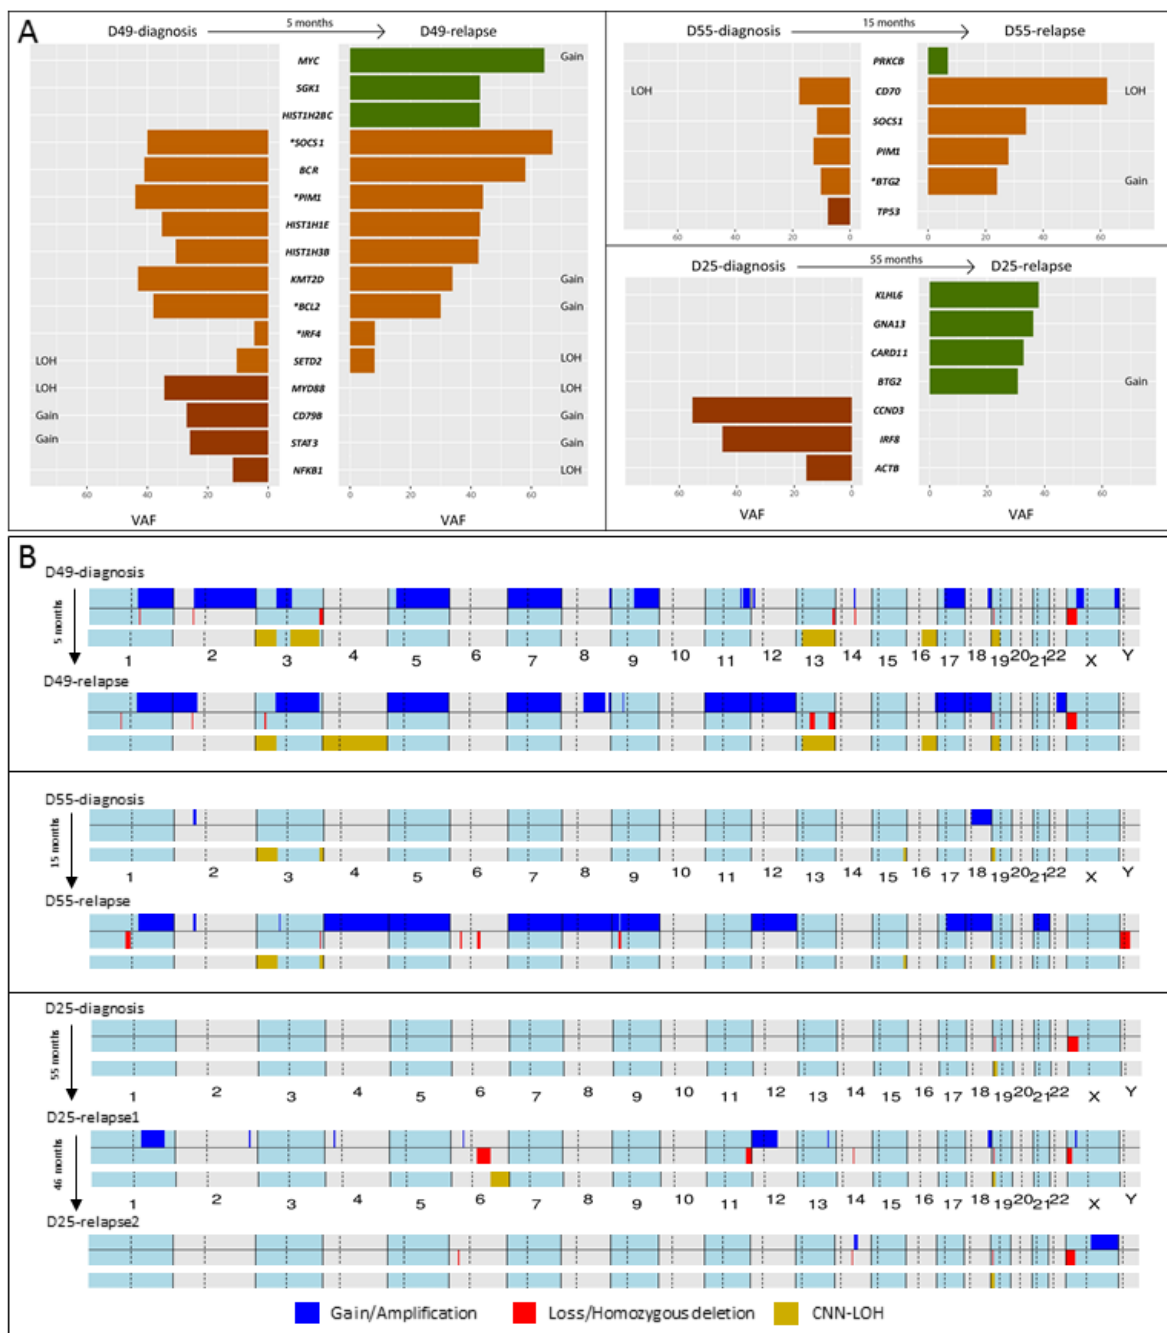

**Supplemental Figure 11. Copy number (CN) analysis. (A)** Global copy number and **(B)** copy number neutral loss of heterozygosity (CNN-LOH) profile of 49 pediatric/young-adult LBCL primary tumors excluding the four cases predicted as molecular PMBL. X-axis indicates chromosomes from 1 to Y and p to q. The vertical axis indicates frequency of the genomic aberration among the analyzed cases. Gains are depicted in blue, losses are depicted in red and CNN-LOH are depicted in yellow. Recurrent CN and CNN-LOH regions (>10% of cases) are indicated.

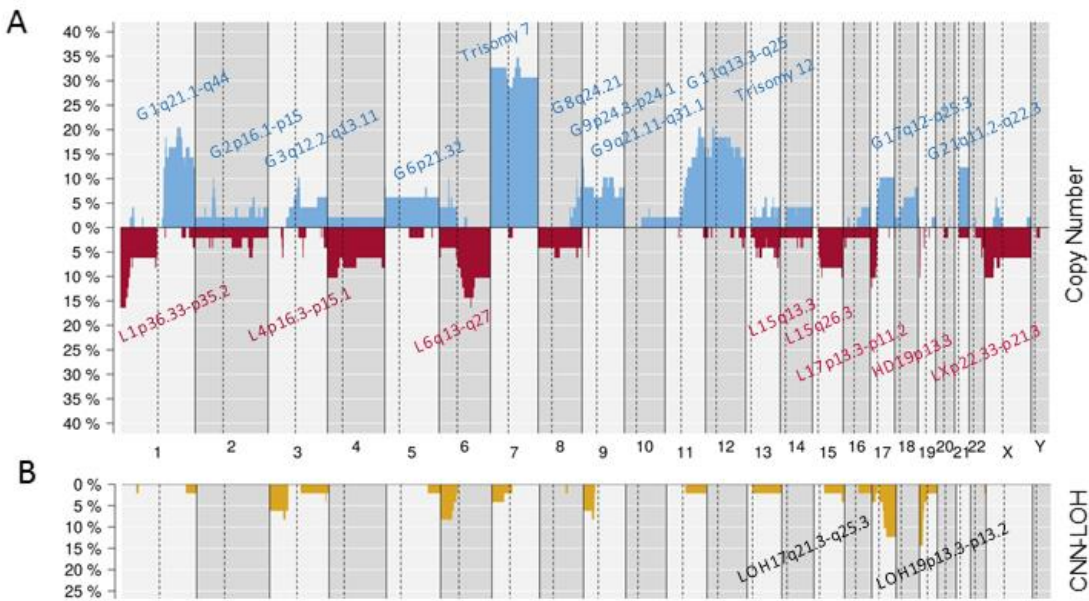

**Supplemental Figure 12.** Heatmap of differentially expressed genes in LBCL-*IRF4* (n=11) versus DLBCL (n=10) based on the nCounter PanCancer Immune Profiling Panel (NanoString inc.). Asterisk indicates NF- $\kappa$ B target gene according to <http://www.bu.edu/nf-kb/gene-resources/target-genes/>.

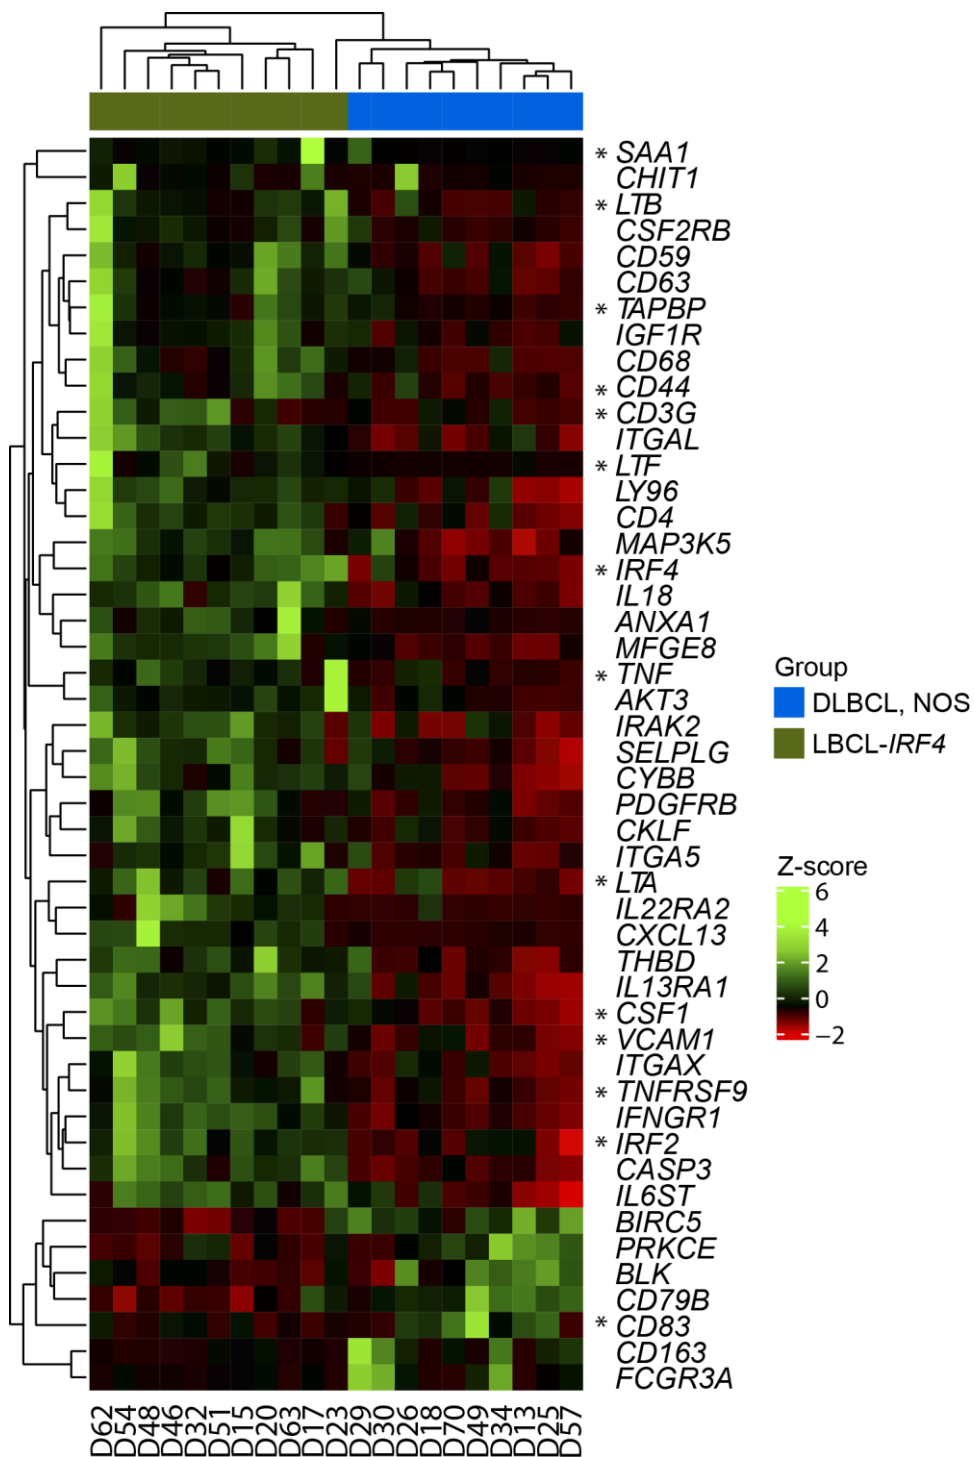

**Supplemental Figure 13.** Clinical and molecular parameters associated to worse EFS in the 46 current series with available follow up. COO: Cell of origin; UNC: unclassified/intermediate.

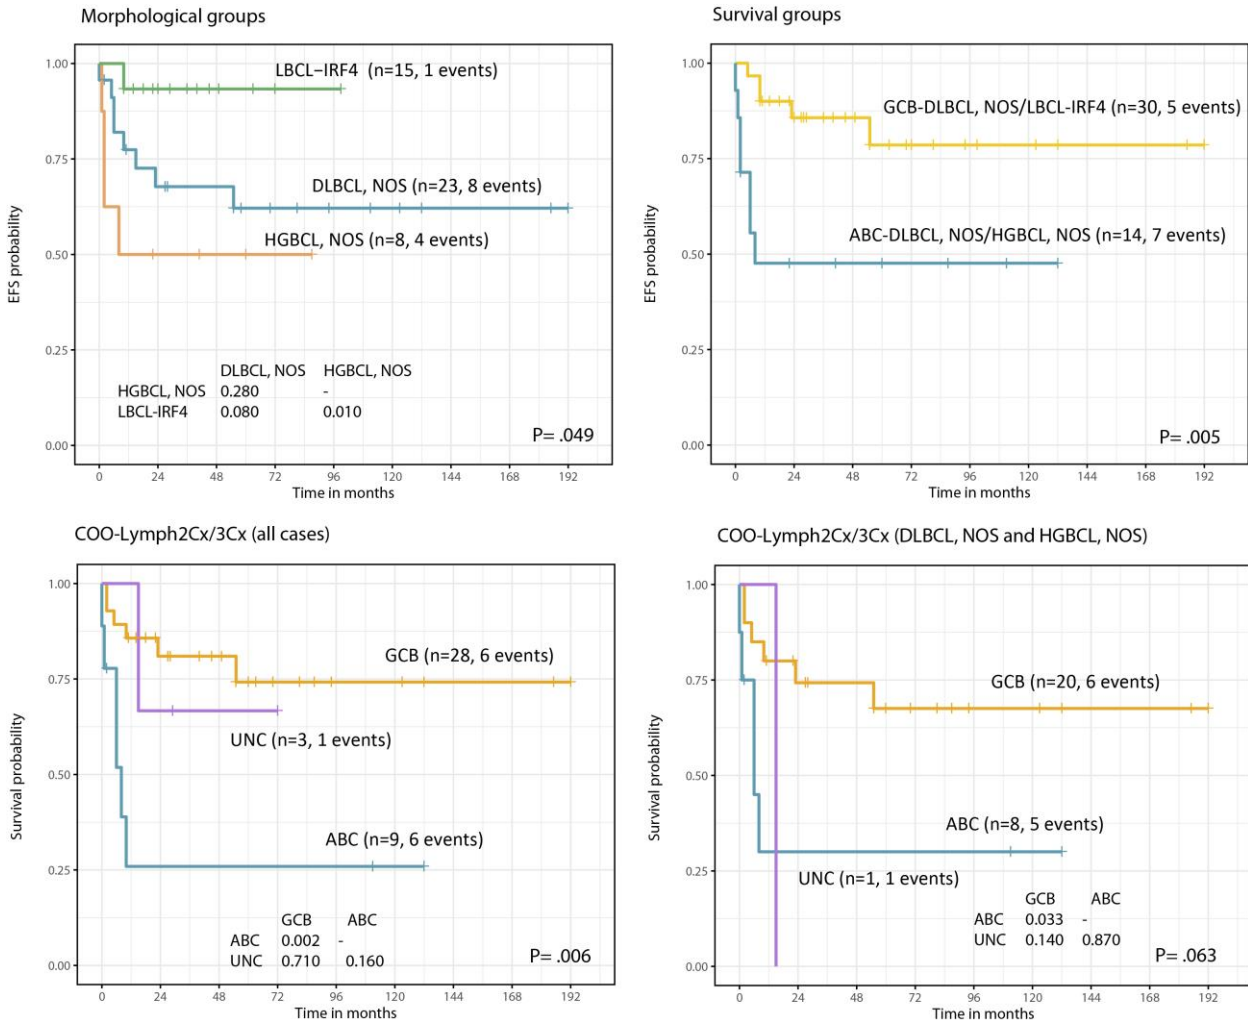

## Supplemental Tables

**Supplemental Table 1.** Details of all antibodies used source and conditions of use.

| Antibody     | Clone      | Source                                     | Antigen retrieval/visualization                                                                             | Dilution |
|--------------|------------|--------------------------------------------|-------------------------------------------------------------------------------------------------------------|----------|
| <b>CD20</b>  | L26        | DAKO,<br>(Copenhagen,<br>Denmark)          | EDTA 1 mM pH 9/ ENVISION FLEX (DAKO)                                                                        | RTU      |
| <b>CD79a</b> | JCB 117    | DAKO                                       | EDTA 1 mM pH 9/ ENVISION FLEX (DAKO)                                                                        | RTU      |
| <b>CD3</b>   | Polyclonal | DAKO                                       | EDTA 1 mM pH 9/ ENVISION FLEX (DAKO)                                                                        | RTU      |
| <b>CD5</b>   | 4C7        | DAKO                                       | EDTA 1 mM pH 9/ ENVISION FLEX (DAKO)                                                                        | RTU      |
| <b>CD10</b>  | 56C6       | DAKO                                       | EDTA 1 mM pH 9/ ENVISION FLEX (DAKO)                                                                        | RTU      |
| <b>BCL6</b>  | PG-B6p     | DAKO                                       | EDTA 1 mM pH 9/ ENVISION FLEX (DAKO)                                                                        | RTU      |
| <b>BCL2</b>  | 124        | DAKO                                       | EDTA 1 mM pH 9/ ENVISION FLEX (DAKO)                                                                        | RTU      |
| <b>Ki67</b>  | Mib-1      | DAKO                                       | Citrate 10 mM pH 6/ ENVISION FLEX (DAKO)                                                                    | RTU      |
| <b>MUM1</b>  | MRQ-43     | Ventana, Roche<br>(Oro Walley,<br>AR, USA) | CC1 solution / ultraView Universal DAB Detection<br>Kit. Automated immunostainer (Benchmark XT;<br>Ventana) | RTU      |
| <b>MYC</b>   | Y69        | Ventana, Roche                             | CC1 solution / ultraView Universal DAB Detection<br>Kit. Automated immunostainer (Benchmark XT;<br>Ventana) | RTU      |
| <b>CD21</b>  | EP3093     | Ventana, Roche                             | CC1 solution / ultraView Universal DAB Detection<br>Kit. Automated immunostainer (Benchmark XT;<br>Ventana) | RTU      |

RTU, ready to use.

According to previous reports, BCL2,<sup>14</sup> BCL6 and MUM1<sup>15</sup> were considered positive when  $\geq 70\%$ ,  $\geq 30\%$  or  $\geq 60\%$  of the cells were positive. MYC was considered positive when more than 40% of positive tumor cells were observed, following the criteria Johnson et al.<sup>22</sup>

**Supplemental Table 2.** Ninety-six genes analyzed using SureSelectXT Target NGS panel including references for inclusion in the mutational analysis and mean coverage by gene and amplicon.

*Provided in excel format*

**Supplemental Table 3.** Ampliseq Target NGS design for sequencing 29 selected genes.

*Provided in excel format*

**Supplemental Table 4.** Primers used for variant verification.**SOCS1**

| Primer name | Seq (5'-3')          | Amplicon size (pb) | Case     |
|-------------|----------------------|--------------------|----------|
| SOCS1-M1-F  | CACCCCCGGACGCTATG    | 299                | D28, D64 |
| SOCS1-M1-R  | AGGGGCCCCCAGTAGAAT   |                    |          |
| SOCS1-N2-F  | CTGAAAGTGACGCGGATG   | 167                | D55R     |
| SOCS1-N2-R  | CCTGCGGATTCTACTGGGG  |                    |          |
| SOCS1-A5-F  | GAGGAGGAGGAAGAGGAGGA | 114                | D49      |
| SOCS1-A5-R  | GGCTGGCCCCTTCTGTAG   |                    |          |
| SOCS1-A4-F  | AGGGGCCCCCAGTAGAAT   | 176                | D49      |
| SOCS1-A4-R  | TCCTCCTCTTCCTCCTCCTC |                    |          |
| SOCS1-A2-F  | CTGCCATCCAGGTGAAAGC  | 93                 | D33      |
| SOCS1-A2-R  | GAAGTGTCTTTTCGCCCTTA |                    |          |
| SOCS1-A1-F  | AGGGGAAGGAGCTCAGGTAG | 201                | D33      |
| SOCS1-A1-R  | AGAGCTTCGACTGCCTCTTC |                    |          |

**IRF4**

| Primer name | Seq (5'-3')          | Amplicon size (pb) | Case          |
|-------------|----------------------|--------------------|---------------|
| IRF4-N1-F   | CAGCTCTTCTCCCCGCAG   | 213                | D15, D32, D54 |
| IRF4-N1-R   | TTCTCCTCGTTCTCCACAC  |                    |               |
| IRF4-N2-F   | CGGAGAGTTCGGCATGAG   | 200                | D17, D54, D50 |
| IRF4-N2-R   | GGCCGGAGACCTTGAAGAG  |                    |               |
| IRF4-N3-F   | GTGTGGGAGAACGAGGAGAA | 236                | D15, D54      |
| IRF4-N3-R   | GACGCCACCTGATGCCTC   |                    |               |
| IRF4-A1-F   | CGCAGTGCAGAGCAGAGC   | 200                | D21           |
| IRF4-A1-R   | TTCTCCTCGTTCTCCACAC  |                    |               |

**BCR**

| Primer name | Seq (5'-3')           | Amplicon size (pb) | Case |
|-------------|-----------------------|--------------------|------|
| BCR-1-F     | GCTTCCTGAAGGACAACCTG  | 93                 | D49  |
| BCR-1-R     | CGACGTAGATGCTCTGGTAGG |                    |      |
| BCR-2-F     | CACCACCTACCGCATGTTC   | 106                | D49  |
| BCR-2-R     | GTGCCGCTTATGGCACTG    |                    |      |

**CCND3**

| Primer name | Seq (5'-3')           | Amplicon size (pb) | Case |
|-------------|-----------------------|--------------------|------|
| CCND3-1-F   | GCCCCTCCTCTGCTTAGTG   | 89                 | D25  |
| CCND3-1-R   | AGCCAGACCAGCACTCCTAC  |                    |      |
| CCND3-2-F   | TCTGTAGGAGTGCTGGTCTGG | 116                | D21  |
| CCND3-2-R   | GAAGCTGCACTCAGGGAGAG  |                    |      |

**KMT2D**

| Primer name | Seq (5'-3')          | Amplicon size (pb) | Case |
|-------------|----------------------|--------------------|------|
| KMT2D-F     | GGCCATTGACTCAGGGGTAG | 90                 | D49  |
| KMT2D-R     | GACCCAGCCGTTTCTTCAG  |                    |      |

**IRF8**

| Primer name | Seq (5'-3')          | Amplicon size (pb) | Case |
|-------------|----------------------|--------------------|------|
| IRF8-F      | GCAGAAGAGGCTGGGAAGAG | 92                 | D25  |
| IRF8-R      | TCTGGAAACATCCGGAAGAC |                    |      |



**EZH2**

| Primer name | Seq (5'-3')               | Amplicon size (pb) | Case |
|-------------|---------------------------|--------------------|------|
| EZH2-F      | GAATACAGGTTATCAGTGCCTTACC | 91                 | D33  |
| EZH2-R      | AGGCTGGGGGATTTTATCA       |                    |      |

**CREBBP**

| Primer name | Seq (5'-3')          | Amplicon size (pb) | Case |
|-------------|----------------------|--------------------|------|
| CREBBP-F    | TGAGGCTGCTGGAAGCTGG  | 160                | D33  |
| CREBBP-R    | TGGCGAGTATGAATCCACAG |                    |      |

**MYD88**

| Primer name | Seq (5'-3')         | Amplicon size (pb) | Case |
|-------------|---------------------|--------------------|------|
| MYD88-F     | CCAGCGACATCCAGTTTGT | 161                | D49  |
| MYD88-R     | ACCCCGTGGCCTTCTAGC  |                    |      |

**DDX3X**

| Primer name | Seq (5'-3')               | Amplicon size (pb) | Case |
|-------------|---------------------------|--------------------|------|
| DDX3X-F     | AAACACTGTCATCTACCAATGTCTG | 154                | D33  |
| DDX3X-R     | CTTCATGGCCCTCAAAGC        |                    |      |

**CD79B**

| Primer name | Seq (5'-3')          | Amplicon size (pb) | Case |
|-------------|----------------------|--------------------|------|
| CD79B-2-F   | CTGGCACACACCCATGACT  | 158                | D49  |
| CD79B-2-R   | GCATGGAAGAGTCCCAGAAC |                    |      |
| CD79B-3-F   | GTTCTGGGACTCTTCCATGC | 163                | D33  |
| CD79B-3-R   | GCAGAGCCCACGTTTCATAG |                    |      |
| CD79B-4-F   | GCTATGAAACGTGGGCTCTG | 150                | D49  |
| CD79B-4-R   | GGACTAAGCCCAGGGAGTCT |                    |      |

**RHOA**

| Primer name | Seq (5'-3')           | Amplicon size (pb) | Case |
|-------------|-----------------------|--------------------|------|
| RHOA-2-F    | GCTTTCCATCCACCTCGATA  | 200                |      |
| RHOA-2-R    | GACTTCTTGTGCATTGCAGGT |                    |      |
| RHOA-3-F    | AGCTACACAGGCAGTGACAAA | 209                |      |
| RHOA-3-R    | GGGGGATTAACCTTGCCTC   |                    |      |

**Supplemental Table 5.** Clinicopathological features of 31 Diffuse large B-cell lymphoma, NOS.

| Case | Age, gender | Biopsy site        | Immunophenotype |      |      |      | <i>In situ</i> hybridization |     |      |      | Stage* | COO Nanostring (Lymph2Cx) | Treatment | Outcome, Follow-up |
|------|-------------|--------------------|-----------------|------|------|------|------------------------------|-----|------|------|--------|---------------------------|-----------|--------------------|
|      |             |                    | CD10            | BCL6 | MUM1 | BCL2 | EBER                         | MYC | BCL2 | BCL6 |        |                           |           |                    |
| D3R  | 20, M       | Supraclavicular LN | +               | +    | +    | -    | -                            |     |      |      |        | GCB                       | CT-A      | CR, 197m**         |
| D5   | 20, F       | LN                 | -               | +    | -    | +    | -                            | N   | N    |      |        | GCB                       |           |                    |
| D6   | 25, F       | Axillary LN        | -               | +    | -    |      | -                            | N   | N    | N    | II     | GCB <sup>#</sup>          | CT-A      | CR, 164m           |
| D8   | 25, M       | Inguinal LN        | -               | +    | -    |      | -                            | N   | N    | N    | II     | GCB                       | CT-A      | CR, 185m           |
| D9   | 22, F       | LN                 | -               | +    | +    | +    | -                            | N   | N    | N    | II     | ABC                       | CT-A      | DwD, 20m**         |
| D10  | 21, M       | Cervical LN        | -               | -    | -    | +    | -                            | N   | N    | R    | II     | GCB                       | CT-A      | CR, 132m           |
| D12  | 17, M       | LN                 | -               | +    | +    | +    | -                            | N   | N    | N    | I      | ABC                       | CT-A      | CR, 111m           |
| D13  | 4, F        | Supraclavicular LN | +               | +    | +    | +    | -                            | N   | N    | N    | I      | GCB                       | CT-P      | CR, 70m            |
| D14R | 11, M       | Abdominal LN       | +               | +    | -    | -    | -                            |     |      |      |        | GCB                       | CT-P      | DwD, 80m**         |
| D18  | 16, M       | Inguinal LN        | +               | +    | +    | -    |                              | N   | N    | N    | I-A    | GCB                       | CT-A      | CR, 94m            |
| D22  | 24, M       | Liver              | -               | +    | -    |      | -                            |     |      |      | IV     | GCB                       | CT-A      | CR, 55m            |
| D24  | 2, M        | Lung               | -               | +    | -    | +    | +                            |     | N    |      |        |                           | CT-P      | CR, 58m            |
| D25  | 5, F        | Cervical LN        | +               | +    | -    | -    |                              | N   | N    | N    | I      | GCB                       | CT-P      | CR, 145m**         |
| D26  | 12, M       | Spleen             | +               | +    | +    | +    | -                            | R   | N    | N    |        | ABC                       | CT-P      | DwD, 6m**          |
| D27  | 11, M       | Cervical LN        |                 | -    | -    | -    | +                            | N   |      |      | IV-B   | ABC                       | CT-P      | CR, 132m           |

|     |       |                             |   |   |   |   |   |   |   |   |      |      |      |            |
|-----|-------|-----------------------------|---|---|---|---|---|---|---|---|------|------|------|------------|
| D28 | 14, M | Cervical LN                 | + | + | - | - | - | N | N | N | IV-A | GCB  | CT-P | CR, 81m    |
| D29 | 1, M  | Small bowel                 | - | + | - | - | + | N | N | N | III  | GCB  | CT-P | CR, 192m   |
| D30 | 1, F  | LN                          | - | - | - | + | + |   |   |   | IV   | ABC  |      | DwD, 0m**  |
| D33 | 9, F  | Mediastinal mass            | - | + | + | + | - | R | N | N | IV   | GCB# | CT-P | CR, 23m**  |
| D34 | 11, M | Cervical LN                 | + | + | - | - | - | N |   | N |      | GCB  | CT-P | CR, 27m    |
| D38 | 12, F | Tonsil and submandibular LN | + | + | - | + |   | N | N | N | II   | GCB  | CT-P | CR, 28m    |
| D40 | 24, M | Supraclavicular LN          | - | + | + | + | - |   |   | N | III  | UNC# | CT-A | DwD, 11m** |
| D42 | 22, M | Mediastinal LN              | + | + | - | + |   | N | N | N | IV   | GCB# | CT-A | CR, 184m** |
| D43 | 22, F | Cervical LN                 | - | - | + |   | + | N | N | N | II   | UNC  |      |            |
| D49 | 21, M | Tonsil                      | + | + | + | - |   | N | R | R |      | GCB  | CT-A | CR, 34m**  |
| D55 | 25, M | Axillary LN                 | + | + | - |   | - | N | N | N | IV   | UNC  | CT-A | DwD, 31m** |
| D56 | 1, M  | Cervical LN                 | - | - | + | + |   | N | N | N | IV   | ABC  | CT-P | CR, 2m     |
| D57 | 5, M  | Abdominal mass              | - | + |   | + | - | R | N | N | III  |      | CT-P | CR, 123m   |
| D64 | 16, M | Inguinal LN                 | - | + | - | + | - | N | N | N |      |      |      |            |
| D70 | 9, M  | Axillary LN                 | + | + | + | + | - | N | N | N |      |      |      |            |
| D71 | 10, M | Appendix                    | + | + | + | + | - |   | N | N | III  | GCB  | CT-P | CR, 8m     |

**Abbreviations:** R: relapse; M: male; F: Female; LN: Lymph node; R: rearrangement; N: Normal; COO: Cell of origin; GCB: Germinal center B-cell; ABC: Activated B-cell; UNC: Intermediate/unclassified; CT-P: Chemotherapy with pediatric schema protocol; CT-A: Chemotherapy with adult schema protocol (R-CHOP/ESHAP); CR: Complete response; DwD: Dead with disease; m: months.

\*Stage was established according St. Jude/International pediatric NHL staging system (IPNHLSS) or Ann Arbor staging system for pediatric and adult patients respectively.

\*\*Patients who had a relapse/progression

#Predicted as mPMBL by Lymph3Cx and are also described in Supplementary Table 7.

**Supplemental Table 6.** Pathological and clinical features of 12 High grade B-cell lymphoma, NOS.

| Case | Age, gender | Biopsy site     | Morphology | Immunophenotype |      |      |      |     |     | <i>In situ</i> hybridization |     |      |      | Stage* | COO Nanostring (Lymph2Cx) | Treatment | Outcome, Follow-up |
|------|-------------|-----------------|------------|-----------------|------|------|------|-----|-----|------------------------------|-----|------|------|--------|---------------------------|-----------|--------------------|
|      |             |                 |            | CD10            | BCL6 | MUM1 | BCL2 | TdT | MYC | EBER                         | MYC | BCL2 | BCL6 |        |                           |           |                    |
| D19  | 7, M        | Retroperitoneum | Blastoid   | +               |      | -    | +    | -   | +   |                              | R   | N    |      |        | CT-P                      | CR, 41m   |                    |
| D36  | 14, M       | Abdominal tumor | DLBCL/BL   | +               | +    | -    | +    |     |     | +                            | N   | N    | N    | III    | GCB                       | CT-P      | DwD, 2m            |
| D37  | 3, M        | Abdominal LN    | DLBCL/BL   | +               | +    | -    | +    | -   |     | -                            | N   | N    | N    | III    | GCB                       | CT-P      | CR, 22m            |
| D52  | 23, F       | Breast          | DLBCL/BL   | -               | +    | +    | +    | -   |     | -                            | N   | N    | R    | IV-A   | ABC                       | CT-P      | CR, 191m**         |
| D53  | 13, F       | Stomach         | DLBCL/BL   | +               | +    | -    | -    | -   |     | -                            | N   | N    | N    | IV     | GCB                       | CT-P      | CR, 87m            |
| D58  | 4, M        | LN              | DLBCL/BL   | -               |      |      | -    |     |     | +                            |     |      |      | IV     | ABC                       | CT-P      | DwD, 1m            |
| D59  | 5, F        | Kidney          | DLBCL/BL   | +               | +    |      | +    | -   | +   | -                            | R   | N    | N    |        |                           |           | D, 1m <sup>#</sup> |
| D61  | 12, M       | Intestine       | Blastoid   | +               | +    |      |      | -   | -   | -                            | N   |      |      |        |                           |           |                    |
| D65  | 4, M        | Retroperitoneum | Blastoid   | +               |      |      |      |     |     |                              | N   |      |      | III    | GCB                       | CT-P      | DwD, 7m**          |
| D72  | 19, M       | Palate          | DLBCL/BL   | +               | +    | +    | -    |     | +   | -                            | N   | N    | N    |        | GCB                       |           |                    |
| D73  | 12, M       | Tonsil          | DLBCL/BL   | +               |      |      | -    |     | -   | -                            | R   | N    | N    |        | GCB                       |           |                    |
| D75  | 6, F        | Intestine       | Blastoid   | +               | +    | -    | -    | -   |     | -                            | R   |      |      | II     | GCB                       | CP-P      | CR, 60m            |

**Abbreviations:** M: male; F: Female; LN: Lymph node; R: rearrangement; N: Normal; COO: Cell of origin; GCB: Germinal center B-cell; ABC: Activated B-cell; CT-P: Chemotherapy with pediatric schema protocol; CR: Complete response; D: died; DwD: Dead with disease; m: months.

\*Stage was established according St. Jude/International pediatric NHL staging system (IPNHLSS) or Ann Arbor staging system for pediatric and adult patients respectively.

\*\* Patients who had a relapse/progression and need rescue treatment.

<sup>#</sup> This patient died before treatment due to cardiac arrest during port-a cath insertion, so this event is excluded of survival analysis.

**Supplemental Table 7.** Clinical, morphological and genetic data of four cases predicted as PMBL and 5 cases predicted as uncertain between mPMBL and DLBCL by Lymph3Cx assay.

| Case | Age, Gender | Diagnosis | Biopsy Site        | Other sites                                                     | PMBL morphological features | Hans   | EBV | FISH MYC | FISH CIITA | 9p24 JAK2 | 2p16 REL | Lymph3Cx           | Lymph2Cx |
|------|-------------|-----------|--------------------|-----------------------------------------------------------------|-----------------------------|--------|-----|----------|------------|-----------|----------|--------------------|----------|
| D6   | 25, F       | DLBCL     | Axillary LN        |                                                                 | Not typical                 | GC     | -   | -        |            | Tri 9     | WT       | PMBL               | GCB      |
| D33  | 9, F        | DLBCL     | Mediastinal mass   | BM, pelvis and ovary                                            | Not typical                 | Non-GC | -   | +        |            | WT        | Ampli    | PMBL               | GCB      |
| D40  | 24, M       | DLBCL     | Supraclavicular LN | Multiple LN in thoracic region and mediastinum, bone and spleen | Typical                     | Non-GC | -   | -        |            | Tri 9     | WT       | PMBL               | UNC      |
| D42  | 22, M       | DLBCL     | Mediastinal LN     | BM, lung, liver, suprarenal and renal                           | Not typical                 | GC     |     | -        | -          | WT        | WT       | PMBL               | GCB      |
| D5   | 20, F       | DLBCL     | LN                 |                                                                 | Not typical                 | GC     | -   | -        |            | WT        | WT       | Uncertain PMBL/GCB | GCB      |
| D8   | 25, M       | DLBCL     | Inguinal LN        |                                                                 | Not typical                 | GC     | -   | -        |            |           |          | Uncertain PMBL/GCB | GCB      |
| D27  | 11, M       | DLBCL     | Cervical LN        | BM and spleen                                                   | Not typical                 | Non-GC | +   | -        |            | Ampli     | WT       | Uncertain PMBL/UNC | ABC      |
| D43  | 22, F       | DLBCL     | Cervical LN        |                                                                 | Not typical                 | Non-GC | +   | -        |            | Gain      | WT       | Uncertain PMBL/GCB | UNC      |
| D49  | 21, M       | DLBCL     | Tonsil             |                                                                 | Not typical                 | GC     |     | -        |            | WT        | Ampli    | Uncertain PMBL/GCB | GCB      |

**Abbreviations:** F: Female; M: Male; LN: Lymph node; BM: bone marrow; GC: germinal center; Tri: trisomy; Ampli: amplification; GCB: Germinal Center B-cell derived; ABC: Activated B-cell derived; PMBL: Primary mediastinal large B-cell lymphoma; UNC: Unclassified; WT: wild type. Copy number alterations obtained from Oncoscan/SNP-array analysis.

**Supplemental Table 8.** List of somatic mutations in LBCL including prediction of amino acid changes that affect protein function (MA, SIFT, Polyphen2, CADD and CHASM).

*Provided in excel format.*

**Supplemental Table 9.** Aberrant somatic hypermutation (aSHM) hallmarks in frequently mutated genes#

| Gene name     | Total SNV | Mutated cases | Mutations/case | Variants within AID target region | AID-target region bias ( <i>P</i> -value) | Transition over transversions bias ( <i>P</i> -value) | AID-motif bias ( <i>P</i> -value) |
|---------------|-----------|---------------|----------------|-----------------------------------|-------------------------------------------|-------------------------------------------------------|-----------------------------------|
| <i>MYC</i>    | 85        | 11            | 7.73           | 75                                | 0.88 (<0.001)                             | 0.74 (0.111)                                          | 0.59 (0.002)                      |
| <i>IRF4</i>   | 83        | 16            | 5.19           | 80                                | 0.96 (<0.001)                             | 1.10 (<0.001)                                         | 0.55 (0.172)                      |
| <i>PIM1</i>   | 29        | 12            | 2.42           | 29                                | 1.00 (0.001)                              | 1.64 (0.002)                                          | 0.66 (0.758)                      |
| <i>SOCS1</i>  | 19        | 7             | 2.71           | 19                                | 1.00 (1.000)                              | 0.58 (0.935)                                          | 0.42 (0.470)                      |
| <i>EGR1</i>   | 17        | 6             | 2.83           | 16                                | 0.94 (0.091)                              | 2.20 (0.006)                                          | 0.69 (1.000)                      |
| <i>SGK1</i>   | 16        | 6             | 2.67           | 16                                | 1.00 (<0.001)                             | 2.20 (0.006)                                          | 0.81 (0.044)                      |
| <i>CARD11</i> | 10        | 10            | 1.00           | 0                                 | -                                         | -                                                     | -                                 |

# Ten single nucleotide variants including driver and passengers predicted, synonymous and *MYC*-intronic.

AID-target region is defined as 2Kb region after 150bp from a transcript start site)

AID-motifs correspond to sequences WA/TW/WRCY/RGYW/WGCW)<sup>16</sup>

Significance value was calculated using Test of Equal or Given Proportions.

**Supplemental Table 10.** Intron1 *BCL6* mutational analysis results using Ampliseq Target NGS. Potential IRF4-binding sites within the 5' flanking sequences and the first intron of the *BCL6* gene were previously defined by Saito et al.<sup>23</sup>

*Provided in excel format*

**Supplemental Table 11.** Global copy number and copy number neutral loss of heterozygosity alterations in 59 LBCL cases

*Provided in excel format*

**Supplemental Table 12.** Differentially expressed genes in LBCL-*IRF4* (n=11) vs DLBCL (n=10) based on the Nanostring PanCancer Immune Profiling Panel. *P*-value from False Discovery Rate test for multiple testing). Asterisk indicates NF- $\kappa$ B target gene according to <http://www.bu.edu/nf-kb/gene-resources/target-genes/>.

*Provided in excel format*



**Supplemental Table 13.** Clinicopathological features of the different age groups.

|                                 |                   |             |             |             | Significance ( <i>P</i> -value) |                         |                                        |
|---------------------------------|-------------------|-------------|-------------|-------------|---------------------------------|-------------------------|----------------------------------------|
| Characteristics                 |                   | 0-18 y      | 19-25 y     | All LBCL    | >25 y <sup>¶</sup>              | Age (0-18y) vs (19-25y) | Pediatric/young-adult vs adult (>25 y) |
|                                 |                   |             |             |             |                                 |                         |                                        |
| Num. Patients                   |                   | 45          | 14          | 59          | 144                             |                         |                                        |
| Type                            |                   |             |             |             |                                 |                         |                                        |
|                                 | DLBCL, NOS        | 18/45 (40%) | 9/14 (64%)  | 27/59 (46%) |                                 | 0.134                   |                                        |
|                                 | HGBCL, NOS        | 10/45 (22%) | 2/14 (14%)  | 12/59 (20%) |                                 | 0.712                   |                                        |
|                                 | LBCL- <i>IRF4</i> | 17/45 (38%) | 3/14 (21%)  | 20/59 (34%) |                                 | 0.342                   |                                        |
| Ratio M:F                       |                   | 28:17       | 9:5         | 37:22       | 74:70                           | 1.000                   | 0.163                                  |
| Primary extranodal involvement  |                   | 15/45 (33%) | 4/14 (29%)  | 19/59 (32%) |                                 | 1.000                   |                                        |
| Head and neck                   |                   | 21/40 (53%) | 6/12 (50%)  | 27/52 (52%) |                                 | 1.000                   |                                        |
| Stage III/IV                    |                   | 14/29 (48%) | 4/10 (40%)  | 18/39 (46%) | 78/143 (55%)                    | 0.726                   | 0.371                                  |
| LDH high                        |                   | 8/25 (32%)  | 4/7 (57%)   | 12/32 (38%) | 65/142 (46%)                    | 0.379                   | 0.436                                  |
| <i>In situ</i> Hybridization    |                   |             |             |             |                                 |                         |                                        |
|                                 | EBV (EBER)        | 6/32 (19%)  | 1/12 (8%)   | 7/44 (16%)  |                                 | 0.653                   |                                        |
|                                 | FISH MYC          | 6/34 (18%)  | 0/11 (0%)   | 6/45 (13%)  | 11/119 (9%)                     | 0.311                   | 0.566                                  |
|                                 | FISH BCL2         | 0/29 (0%)   | 1/9 (11%)   | 1/38 (3%)   | 25/125 (20%)                    | 0.237                   | <b>0.010</b>                           |
|                                 | FISH BCL6         | 0/29 (0%)   | 3/8 (38%)   | 3/37 (8%)   | 24/117 (21%)                    | <b>0.007</b>            | 0.134                                  |
|                                 | FISH IRF4         | 14/31 (45%) | 3/9 (33%)   | 17/40 (43%) |                                 | 0.707                   |                                        |
| COO-Hans                        |                   |             |             |             |                                 |                         |                                        |
|                                 | GC                | 31/44 (70%) | 8/14 (57%)  | 39/58 (67%) |                                 | 0.514                   |                                        |
|                                 | Non-GC            | 13/44 (30%) | 6/14 (43%)  | 19/58 (33%) |                                 | 0.514                   |                                        |
| COO-Nanostring #                |                   |             |             |             |                                 |                         |                                        |
|                                 | GCB               | 27/36 (75%) | 8/13 (62%)  | 35/49 (71%) | 43/105 (41%)                    | 0.476                   | <b>&lt;0.001</b>                       |
|                                 | ABC               | 6/36 (17%)  | 3/13 (23%)  | 9/49 (18%)  | 49/105 (47%)                    | 0.683                   | <b>0.009</b>                           |
|                                 | UC                | 3/36 (8%)   | 2/13 (15%)  | 5/49 (10%)  | 13/105 (12%)                    | 0.598                   | 1.000                                  |
| Genetics                        |                   |             |             |             |                                 |                         |                                        |
|                                 | No. Mutations     | 5.1 (0-16)  | 5.8 (1-20)  | 5.2 (0-20)  |                                 | 0.969                   |                                        |
|                                 | No. CNA           | 4.5 (0-24)  | 12.8 (1-34) | 6.2 (0-34)  | 20 (1-108)                      | <b>0.046</b>            | <b>&lt;0.001</b>                       |
|                                 | Chromothripsis    | 1/39 (3%)   | 3/10 (30%)  | 4/49 (8%)   | 28/116 (24%)                    | <b>0.023</b>            | 0.077                                  |
| CR rate of first line treatment |                   | 29/35 (83%) | 9/11 (82%)  | 38/46 (83%) | 96/142 (68%)                    | 1.000                   | 0.061                                  |
| Rituximab                       |                   | 7/35 (20%)  | 9/11 (82%)  | 16/46 (35%) | 116/143 (81%)                   | <b>&lt;0.001</b>        | <b>&lt;0.001</b>                       |
| No. of deads                    |                   | 6/35 (17%)  | 2/11 (18%)  | 8/46 (17%)  | 82/144 (57%)                    | 1.000                   | <b>&lt;0.001</b>                       |
| Relapse/Progress                |                   | 7/35 (20%)  | 6/11 (55%)  | 13/46 (28%) | 70/144 (49%)                    | 0.051                   | <b>0.017</b>                           |
| Median Follow-up                |                   | 38.5 months | 40 months   | 40 months   | 84 months                       | 0.234                   | 0.581                                  |
| 5-year OS                       |                   | 86%         | 79%         | 83%         | 63%                             | 0.910                   | <b>0.007</b>                           |
| 5-year EFS                      |                   | 76%         | 46%         | 68%         | 65%                             | <b>0.044</b>            | 0.490                                  |

<sup>#</sup>Cell of origin by Lymph2Cx or Lymph3Cx.

Abbreviations; y: years; M: male; F: female; GC: germinal center; CR: Complete response; OS: Overall survival; EFS: Event free survival.

<sup>¶</sup> Clinical data from patients older than 25 years old was recruited and updated from Karube et al.<sup>5</sup>

**Supplemental Table 14.** Clinical and morphological features of the different lymphoma entities.

|                                 |                |              |              | Significance ( <i>P</i> -value) |                         |                     |              |
|---------------------------------|----------------|--------------|--------------|---------------------------------|-------------------------|---------------------|--------------|
|                                 |                |              |              | LBCL-IRF4 vs DLBCL              | LBCL-IRF4 vs HGBCL, NOS | DLBCL vs HGBCL, NOS |              |
| Characteristics                 |                | LBCL-IRF4    | DLBCL, NOS   | HGBCL, NOS                      |                         |                     |              |
| Num. Patients                   |                | 20           | 27           | 12                              |                         |                     |              |
| Median Age                      |                | 14 (5-22)    | 12 (1-25)    | 9.5 (3-23)                      | 0.889                   | 0.093               | 0.330        |
|                                 | 0-18y          | 17/20 (85%)  | 18/27 (67%)  | 10/12 (83%)                     | 0.191                   | 1.000               | 0.446        |
|                                 | 19-25y         | 3/20 (15%)   | 9/27 (33%)   | 2/12 (17%)                      | 0.191                   | 1.000               | 0.446        |
| Ratio M:F                       |                | 9:11         | 20:7         | 8:4                             | 0.069                   | 0.291               | 0.709        |
| Primary extranodal involvement  |                | 4/20 (20%)   | 6/27 (22%)   | 9/12 (75%)                      | 1.000                   | <b>0.004</b>        | <b>0.004</b> |
| Head and neck                   |                | 14/18 (78%)  | 11/23 (48%)  | 2/11 (18%)                      | 0.063                   | <b>0.003</b>        | 0.140        |
| Stage III/IV                    |                | 3/14 (21%)   | 9/18 (50%)   | 6/7 (86%)                       | 0.147                   | <b>0.016</b>        | 0.179        |
| LDH high                        |                | 2/12 (17%)   | 5/12 (42%)   | 5/8 (63%)                       | 0.371                   | 0.062               | 0.650        |
| Immunohistochemistry            |                |              |              |                                 |                         |                     |              |
|                                 | CD10           | 11/20 (55%)  | 13/26 (50%)  | 10/12 (83%)                     | 0.774                   | 0.139               | 0.077        |
|                                 | MUM1           | 20/20 (100%) | 11/26 (42%)  | 2/7 (29%)                       | <b>&lt;0.001</b>        | <b>&lt;0.001</b>    | 0.676        |
|                                 | BCL6           | 20/20 (100%) | 22/27 (81%)  | 8/8 (100%)                      | 0.063                   | 1.000               | 0.315        |
|                                 | KI-67>75%      | 11/14 (79%)  | 15/19 (79%)  | 11/11 (100%)                    | 1.000                   | 0.230               | 0.268        |
|                                 | BCL2           | 10/19 (53%)  | 14/23 (61%)  | 5/11 (45%)                      | 0.756                   | 1.000               | 0.475        |
|                                 | CD20           | 19/19 (100%) | 22/22 (100%) | 9/9 (100%)                      | 1.000                   | 1.000               | 1.000        |
| <i>In situ</i> Hybridization    |                |              |              |                                 |                         |                     |              |
|                                 | EBV (EBER)     | 0/12 (0%)    | 5/22 (23%)   | 2/10 (20%)                      | 0.137                   | 0.195               | 1.000        |
|                                 | FISH MYC       | 0/13 (0%)    | 2/21 (10%)   | 4/11 (36%)                      | 0.513                   | <b>0.031</b>        | 0.148        |
|                                 | FISH BCL2      | 0/10 (0%)    | 1/21 (5%)    | 0/7 (0%)                        | 1.000                   | 1.000               | 1.000        |
|                                 | FISH BCL6      | 0/11 (0%)    | 2/20 (10%)   | 1/6 (17%)                       | 0.527                   | 0.353               | 1.000        |
|                                 | FISH IRF4      | 17/19 (89%)  | 0/17 (0%)    | 0/4 (0%)                        | <b>&lt;0.001</b>        | <b>0.002</b>        | 1.000        |
| COO-Hans                        |                |              |              |                                 |                         |                     |              |
|                                 | GC             | 11/20 (55%)  | 18/27 (67%)  | 10/11 (91%)                     | 0.546                   | 0.055               | 0.225        |
|                                 | Non-GC         | 9/20 (45%)   | 9/27 (33%)   | 1/11 (9%)                       | 0.546                   | 0.055               | 0.225        |
| COO-Nanostring <sup>#</sup>     |                |              |              |                                 |                         |                     |              |
|                                 | GCB            | 10/14 (71%)  | 17/25 (68%)  | 8/10 (80%)                      | 1.000                   | 1.000               | 0.686        |
|                                 | ABC            | 1/14 (7%)    | 6/25 (24%)   | 2/10 (20%)                      | 0.386                   | 0.550               | 1.000        |
|                                 | UC             | 3/14 (21%)   | 2/25 (8%)    | 0/10 (0%)                       | 0.329                   | 0.239               | 1.000        |
| Genetics                        |                |              |              |                                 |                         |                     |              |
|                                 | No. Mutations  | 5.2 (0-11)   | 4.7 (0-20)   | 6.6 (1-11)                      | 0.247                   | 0.278               | 0.143        |
|                                 | No. CNA        | 6.2 (0-27)   | 5.8 (0-34)   | 7.1 (0-27)                      | 0.518                   | 0.697               | 0.939        |
|                                 | Chromothripsis | 2/20 (10%)   | 1/22 (5%)    | 1/7 (14%)                       | 0.598                   | 1.000               | 0.431        |
| CR rate of first line treatment |                | 14/15 (93%)  | 19/23 (83%)  | 5/8 (63%)                       | 0.630                   | 0.103               | 0.335        |
| Rituximab                       |                | 6/15 (40%)   | 10/23 (43%)  | 0/8 (0%)                        | 1.000                   | 0.058               | <b>0.032</b> |
| No. of deads                    |                | 0/15 (0%)    | 5/23 (22%)   | 3/8 (38%)                       | 0.136                   | <b>0.032</b>        | 0.393        |
| Relapse/Progress                |                | 1/15 (7%)    | 8/23 (35%)   | 4/8 (50%)                       | 0.061                   | <b>0.033</b>        | 0.676        |
| Median Follow-up                |                | 29 months    | 70 months    | 22 months                       | 0.060                   | 0.531               | 0.126        |
| 5-year EFS                      |                | 93%          | 62%          | 50%                             | 0.075                   | <b>0.010</b>        | 0.280        |

<sup>#</sup>Cell of origin by Lymph2Cx or Lymph3Cx.

Abbreviations; y: years; M: male; F: female; GC: germinal center; CR: Complete response; OS: Overall survival; EFS: Event free survival.

**Supplemental Table 15.** Clinical and morphological features of the different age groups of DLBCL

| Characteristics                 | 0-18 y      | 19-25 y    | All pDLBCL,<br>NOS | >25 y <sup>¶</sup> | Significance (P-value)  |                                        |                                       |
|---------------------------------|-------------|------------|--------------------|--------------------|-------------------------|----------------------------------------|---------------------------------------|
|                                 |             |            |                    |                    | Age (0-18y) vs (19-25y) | Pediatric/young-adult vs adult (>25 y) | Young-adult (19-25y) vs adult (>25 y) |
| Num. Patients                   | 18          | 9          | 27                 | 144                |                         |                                        |                                       |
| Ratio M:F                       | 14:4        | 6:3        | 20:07              | 74:70              | 0.653                   | <b>0.035</b>                           | 0.721                                 |
| Primary extranodal involvement  |             |            |                    |                    | 0.628                   |                                        |                                       |
| Head and neck                   | 5/18 (28%)  | 1/9 (11%)  | 6/27 (22%)         |                    | 0.667                   |                                        |                                       |
| Stage III/IV                    | 7/16 (44%)  | 4/7 (57%)  | 11/23 (48%)        |                    | 0.620                   | 0.804                                  | 0.416                                 |
| LDH high                        | 7/12 (58%)  | 2/6 (33%)  | 9/18 (50%)         | 78/143 (55%)       | 1.000                   | 1.000                                  | 1.000                                 |
| LDH high                        | 3/8 (38%)   | 2/4 (50%)  | 5/12 (42%)         | 65/142 (46%)       | 1.000                   | 1.000                                  | 1.000                                 |
| <i>In situ</i> Hybridization    |             |            |                    |                    |                         |                                        |                                       |
| EBV (EBER)                      | 4/14 (29%)  | 1/8 (13%)  | 5/22 (23%)         |                    | 0.613                   |                                        |                                       |
| FISH MYC                        | 2/14 (14%)  | 0/7 (0%)   | 2/21 (10%)         | 11/119 (9%)        | 0.533                   | 1.000                                  | 1.000                                 |
| FISH BCL2                       | 0/14 (0%)   | 1/7 (14%)  | 1/21 (5%)          | 25/125 (20%)       | 0.333                   | 0.125                                  | 0.595                                 |
| FISH BCL6                       | 0/14 (0%)   | 2/6 (33%)  | 2/20 (10%)         | 24/117 (21%)       | 0.079                   | 0.364                                  | 1.000                                 |
| FISH IRF4                       | 0/12 (0%)   | 0/5 (0%)   | 0/17 (0%)          |                    | 1.000                   |                                        |                                       |
| COO-Hans                        |             |            |                    |                    |                         |                                        |                                       |
| GC                              | 12/18 (67%) | 6/9 (67%)  | 18/27 (67%)        |                    | 1.000                   |                                        |                                       |
| Non-GC                          | 6/18 (33%)  | 3/9 (33%)  | 9/27 (33%)         |                    | 1.000                   |                                        |                                       |
| COO-Nanostring                  |             |            |                    |                    |                         |                                        |                                       |
| GCB                             | 11/16 (69%) | 6/9 (67%)  | 17/25 (68%)        | 43/105 (41%)       | 1.000                   | <b>0.009</b>                           | 0.268                                 |
| ABC                             | 5/16 (31%)  | 1/9 (11%)  | 6/25 (24%)         | 49/105 (47%)       | 0.364                   | 0.182                                  | 0.259                                 |
| UC                              | 0/16 (0%)   | 2/9 (22%)  | 2/25 (8%)          | 13/105 (12%)       | 0.120                   | 1.000                                  | 0.241                                 |
| Genetics                        |             |            |                    |                    |                         |                                        |                                       |
| No. Mutations                   | 4.4 (0-16)  | 5.4 (1-20) | 4.7 (0-20)         |                    | 0.803                   |                                        |                                       |
| No. CNA                         | 4.9 (0-24)  | 8.2 (1-34) | 5.8 (0-34)         | 20 (1-108)         | 0.682                   | <b>&lt;0.001</b>                       | <b>0.001</b>                          |
| Chromothripsis                  | 1/16 (6%)   | 0/6 (0%)   | 1/22 (5%)          | 28/116 (24%)       | 1.000                   | 0.129                                  | 0.584                                 |
| CR rate of first line treatment | 13/16 (81%) | 6/7 (86%)  | 19/23 (83%)        | 96/142 (68%)       | 1.000                   | 0.221                                  | 0.665                                 |
| Rituximab                       | 4/16 (25%)  | 6/7 (86%)  | 10/23 (43%)        | 116/143 (81%)      | <b>0.019</b>            | <b>&lt;0.001</b>                       | 1.000                                 |
| No. of deads                    | 3/16 (19%)  | 2/7 (29%)  | 5/23 (22%)         | 82/144 (57%)       | 0.621                   | <b>0.003</b>                           | 0.405                                 |
| Relapse/Progress                | 4/16 (25%)  | 4/7 (57%)  | 8/23 (35%)         | 70/144 (49%)       | 0.182                   | 0.264                                  | 1.000                                 |
| Median Follow-up                | 75 months   | 55 months  | 70 months          | 84 months          | 0.504                   | 0.287                                  | 0.138                                 |
| 5-year OS                       | 87%         | 71%        | 81%                | 63%                | 0.740                   | <b>0.035</b>                           | 0.190                                 |
| 5-year EFS                      | 71%         | 43%        | 62%                | 65%                | 0.150                   | 0.900                                  | 0.320                                 |

#Cell of origin by Lymph2Cx or Lymph3Cx.

Abbreviations; y: years; M: male; F: female; GC: germinal center; CR: Complete response; OS: Overall survival; EFS: Event free survival.

<sup>¶</sup>Clinical data from patients older than 25 years old was recruited and updated from Karube et al.<sup>5</sup>

### Supplementary references

1. Gonzalez-Farre B, Ramis-Zaldivar JE, Salmeron-Villalobos J et al. Burkitt-like lymphoma with 11q aberration: A germinal center derived lymphoma genetically unrelated to Burkitt lymphoma. *Haematologica*. 2019 Sep;104(9):1822-1829.
2. Li H, Durbin R. Fast and accurate short read alignment with Burrows-Wheeler transform. *Bioinformatics*. 2009;25(14):1754-1760.
3. McKenna A, Hanna M, Banks E et al. The Genome Analysis Toolkit: a MapReduce framework for analyzing next-generation DNA sequencing data. *Genome Res*. 2010;20(9):1297-1303.
4. Wang K, Li M, Hakonarson H. ANNOVAR: functional annotation of genetic variants from high-throughput sequencing data. *Nucleic Acids Res*. 2010;38(16):e164.
5. van Dongen JJ, Langerak AW, Bruggemann M et al. Design and standardization of PCR primers and protocols for detection of clonal immunoglobulin and T-cell receptor gene recombinations in suspect lymphoproliferations: report of the BIOMED-2 Concerted Action BMH4-CT98-3936. *Leukemia*. 2003;17(12):2257-2317.
6. Karube K, Enjuanes A, Dlouhy I et al. Integrating genomic alterations in diffuse large B-cell lymphoma identifies new relevant pathways and potential therapeutic targets. *Leukemia*. 2018;32(3):675-684.
7. Reva B, Antipin Y, Sander C. Predicting the functional impact of protein mutations: application to cancer genomics. *Nucleic Acids Res*. 2011;39(17):e118.
8. Kumar P, Henikoff S, Ng PC. Predicting the effects of coding non-synonymous variants on protein function using the SIFT algorithm. *Nat Protoc*. 2009;4(7):1073-1081.
9. Adzhubei IA, Schmidt S, Peshkin L et al. A method and server for predicting damaging missense mutations. *Nat Methods*. 2010;7(4):248-249.
10. Kircher M, Witten DM, Jain P et al. A general framework for estimating the relative pathogenicity of human genetic variants. *Nat Genet*. 2014;46(3):310-315.
11. Carter H, Chen S, Isik L et al. Cancer-specific high-throughput annotation of somatic mutations: computational prediction of driver missense mutations. *Cancer Res*. 2009;69(16):6660-6667.
12. Blokzijl F, Janssen R, van BR, Cuppen E. MutationalPatterns: comprehensive genome-wide analysis of mutational processes. *Genome Med*. 2018;10(1):33.

13. Chapuy B, Stewart C, Dunford AJ et al. Molecular subtypes of diffuse large B cell lymphoma are associated with distinct pathogenic mechanisms and outcomes. *Nat Med.* 2018;24(5):679-690.
14. Arthur SE, Jiang A, Grande BM et al. Genome-wide discovery of somatic regulatory variants in diffuse large B-cell lymphoma. *Nat Commun.* 2018;9(1):4001.
15. Alexandrov LB, Kim J, Haradhvala NJ et al. The Repertoire of Mutational Signatures in Human Cancer. *bioRxiv.* 2018
16. Papaemmanuil E, Rapado I, Li Y et al. RAG-mediated recombination is the predominant driver of oncogenic rearrangement in ETV6-RUNX1 acute lymphoblastic leukemia. *Nat Genet.* 2014;46(2):116-125.
17. Jennings LJ, Arcila ME, Corless C et al. Guidelines for Validation of Next-Generation Sequencing-Based Oncology Panels: A Joint Consensus Recommendation of the Association for Molecular Pathology and College of American Pathologists. *J Mol Diagn.* 2017;19(3):341-365.
18. Khodabakhshi AH, Morin RD, Fejes AP et al. Recurrent targets of aberrant somatic hypermutation in lymphoma. *Oncotarget.* 2012;3(11):1308-1319.
19. Reddy A, Zhang J, Davis NS et al. Genetic and Functional Drivers of Diffuse Large B Cell Lymphoma. *Cell.* 2017;171(2):481-494.
20. Schmitz R, Wright GW, Huang DW et al. Genetics and Pathogenesis of Diffuse Large B-Cell Lymphoma. *N Engl J Med.* 2018;378(15):1396-1407.
21. Lopez C, Kleinheinz K, Aukema SM et al. Genomic and transcriptomic changes complement each other in the pathogenesis of sporadic Burkitt lymphoma. *Nat Commun.* 2019;10(1):1459.
22. Johnson NA, Slack GW, Savage KJ et al. Concurrent expression of MYC and BCL2 in diffuse large B-cell lymphoma treated with rituximab plus cyclophosphamide, doxorubicin, vincristine, and prednisone. *J Clin Oncol.* 2012;30(28):3452-3459.
23. Saito M, Gao J, Basso K et al. A signaling pathway mediating downregulation of BCL6 in germinal center B cells is blocked by BCL6 gene alterations in B cell lymphoma. *Cancer Cell.* 2007;12(3):280-292.
